# Supplementary material for: The female protective effect against autism spectrum disorder
Source: PubMed Central journal article supplement (PMC9903803; doi:10.1016/j.xgen.2022.100134), 2022-06-08
Supplement: mmc3.pdf [file mmc3.pdf]

# The female protective effect against autism spectrum disorder

## Graphical abstract

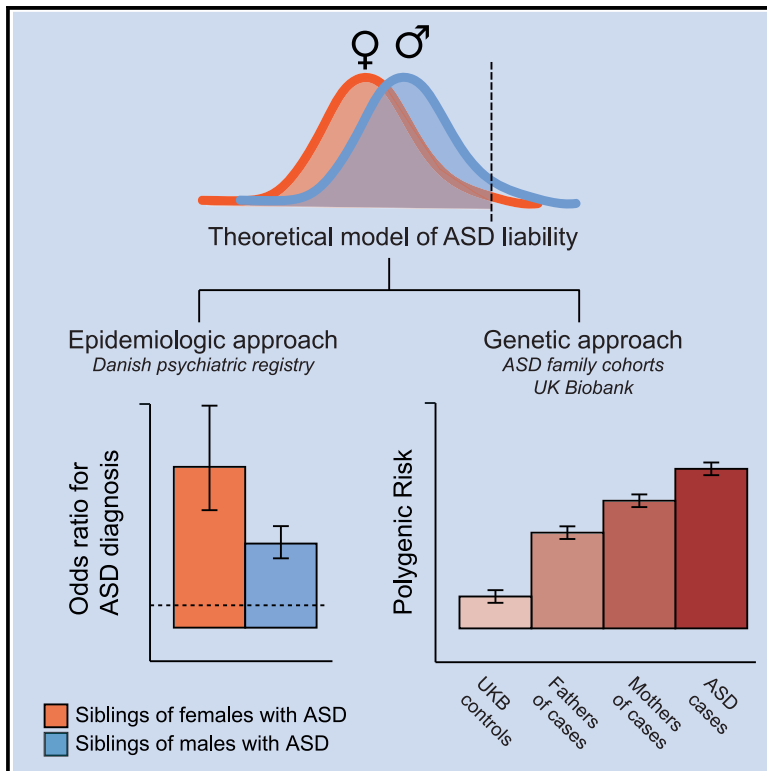

## Authors

Emilie M. Wigdor, Daniel J. Weiner, Jakob Grove, ..., Somer L. Bishop, Anders D. Børglum, Elise B. Robinson

## Correspondence

erob@broadinstitute.org

## In brief

Wigdor et al. find evidence supporting a female protective effect against autism spectrum disorder (ASD): (1) siblings of female ASD probands are more likely to be diagnosed with ASD than siblings of male ASD probands and (2) mothers carry more common, inherited genetic risk for ASD than fathers. Taken together, these results emphasize the breadth of the role of sex in ASD risk and could impact the design and interpretation of genetic and neurobiological studies of ASD.

## Highlights

- Evidence of female protective effect against ASD from common, inherited variation
- Evidence of FPE in both affected and unaffected members of ASD-impacted families
- Mothers of children with ASD carry more genetic risk for ASDs than fathers

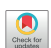

## Article

# The female protective effect against autism spectrum disorder

Emilie M. Wigdor,<sup>1,2</sup> Daniel J. Weiner,<sup>1,3</sup> Jakob Grove,<sup>4,5,6,7</sup> Jack M. Fu,<sup>1,8</sup> Wesley K. Thompson,<sup>9</sup> Caitlin E. Carey,<sup>1,3</sup> Nikolas Baya,<sup>1,3</sup> Celia van der Merwe,<sup>1,3</sup> Raymond K. Walters,<sup>1,3</sup> F. Kyle Satterstrom,<sup>1,3</sup> Duncan S. Palmer,<sup>1,3</sup> Anders Rosengren,<sup>7,10</sup> Jonas Bybjerg-Grauholm,<sup>7,16</sup> iPSYCH Consortium,<sup>17</sup> David M. Hougaard,<sup>7,16</sup> Preben Bo Mortensen,<sup>4,10,12,13</sup> Mark J. Daly,<sup>1,3,11</sup> Michael E. Talkowski,<sup>1,8</sup> Stephan J. Sanders,<sup>14</sup> Somer L. Bishop,<sup>14</sup> Anders D. Børglum,<sup>4,5,10</sup> and Elise B. Robinson<sup>1,3,15,18,\*</sup>

<sup>1</sup>Stanley Center for Psychiatric Research, Broad Institute of MIT and Harvard, Cambridge, MA 02142, USA

<sup>2</sup>Wellcome Trust Sanger Institute, Hinxton CB10 1SA, UK

<sup>3</sup>Analytic and Translational Genetics Unit, Department of Medicine, Massachusetts General Hospital, Boston, MA 02114, USA

<sup>4</sup>Center for Genomics and Personalized Medicine (CGPM), Aarhus University, 8000 Aarhus, Denmark

<sup>5</sup>Department of Biomedicine (Human Genetics) and iSEQ Center, Aarhus University, 8000 Aarhus, Denmark

<sup>6</sup>Bioinformatics Research Centre, Aarhus University, 8000 Aarhus, Denmark

<sup>7</sup>The Lundbeck Foundation Initiative for Integrative Psychiatric Research, iPSYCH, 8210 Aarhus, Denmark

<sup>8</sup>Center for Genomic Medicine, Massachusetts General Hospital, Boston, MA 02114, USA

<sup>9</sup>Laureate Institute for Brain Research, Tulsa, OK 74136, USA

<sup>10</sup>Institute of Biological Psychiatry, MHC Sct Hans, Copenhagen University Hospital, 4000 Roskilde, Denmark

<sup>11</sup>Finnish Institute for Molecular Medicine, University of Helsinki, 00290 Helsinki, Finland

<sup>12</sup>National Center for Register-Based Research, Aarhus University, 8210 Aarhus, Denmark

<sup>13</sup>Center for Integrated Register-based Research, Aarhus University, 8210 Aarhus, Denmark

<sup>14</sup>Department of Psychiatry and Behavioral Sciences, UCSF Weill Institute for Neurosciences, University of California, San Francisco, San Francisco, CA 94158, USA

<sup>15</sup>Department of Epidemiology, Harvard T.H. Chan School of Public Health, Boston, MA 02115, USA

<sup>16</sup>Center for Neonatal Screening, Department for Congenital Disorders, Statens Serum Institut, 2300 Copenhagen, Denmark

<sup>17</sup>A list of members and affiliations appears at the end of the paper

<sup>18</sup>Lead contact

\*Correspondence: [erob@broadinstitute.org](mailto:erob@broadinstitute.org)  
<https://doi.org/10.1016/j.xgen.2022.100134>

## SUMMARY

Autism spectrum disorder (ASD) is diagnosed three to four times more frequently in males than in females. Genetic studies of rare variants support a female protective effect (FPE) against ASD. However, sex differences in common inherited genetic risk for ASD are less studied, particularly within families. Leveraging the Danish iPSYCH resource, we found siblings of female ASD cases ( $n = 1,707$ ) had higher rates of ASD than siblings of male ASD cases ( $n = 6,270$ ;  $p < 1.0 \times 10^{-10}$ ). In the Simons Simplex and SPARK collections, mothers of ASD cases ( $n = 7,436$ ) carried more polygenic risk for ASD than fathers of ASD cases ( $n = 5,926$ ; 0.08 polygenic risk score [PRS] SD;  $p = 7.0 \times 10^{-7}$ ). Further, male unaffected siblings under-inherited polygenic risk ( $n = 1,519$ ;  $p = 0.03$ ). Using both epidemiologic and genetic approaches, our findings strongly support an FPE against ASD's common inherited influences.

## INTRODUCTION

Autism spectrum disorder (ASD) is diagnosed three to four times more frequently in males than in females.<sup>1–3</sup> The possibility of a “female protective effect” (FPE) against ASD has been described extensively and has received consistent support from the results of genetic studies of *de novo* variants.<sup>4–13</sup> Many types of ASD-associated *de novo* variants are observed more frequently in female cases.<sup>4–13</sup> In general, the more ASD risk carried by a *de novo* variant class, the greater its overrepresentation among affected females.<sup>8</sup> This suggests that, on average, females accumulate more risk than males before being ascertained as ASD cases.

Male-female differences are less clear in the context of ASD's common, inherited genetic influences, which constitute the majority of genetic risk for ASD.<sup>14</sup> Given the findings above, we may expect elevated polygenic risk for ASD in female cases; however, that has not been consistently observed.<sup>4,15,16</sup> Inconsistent observations could be a function of statistical power, as the polygenic risk score (PRS) for ASD currently explains limited case-control variance on the liability scale (<3%), and under 4,000 female cases are present in published ASD genome-wide association study (GWAS) meta-analyses.<sup>4,15</sup> A recent study found evidence for increased burden of combination polygenic risk (ASD + schizophrenia + educational attainment) in female

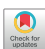

ASD cases,<sup>16</sup> further suggesting a male-female difference may appear using the ASD PRS alone were it better powered.

In this study, we used two complementary strategies to better understand the relationship between sex and inherited genetic risk for ASD. We first conducted a large sibling recurrence analysis, leveraging the Danish Lundbeck Foundation Initiative for Integrative Psychiatric Research (iPSYCH) resource. We then examined the relationship between sex and common, autosomal polygenic risk for ASD in whole families, focusing on both affected and unaffected family members.

Under the FPE model, one expects a greater aggregation of ASD risk in female cases than in male cases. In the context of inherited genetic risk, which is shared within families, that expectation extends to the family members of female cases. For example, we expect siblings of female ASD cases to carry more risk for ASD than siblings of male ASD cases, regardless of whether they are categorically affected themselves.<sup>17</sup> Sibling recurrence is a particularly useful metric of inherited or familial risk. Full siblings share 50% of their segregating DNA variants and are typically close enough in age to share diagnostic environments. Shared diagnostic environment is important when considering ASD recurrence. The estimated prevalence of ASD has increased over 30-fold over the last four decades,<sup>18</sup> primarily due to diagnostic expansion.<sup>19,20</sup> Members of previous generations, particularly those able to live independently as adults, were far less likely to receive an ASD diagnosis in childhood than children born as of writing.<sup>19,20</sup> For this reason, inclusion of parents or aunts and uncles in familial recurrence analyses can complicate data interpretation. Our analysis was accordingly limited to siblings.

Several previous studies have considered the FPE through familial recurrence, with inconsistent results.<sup>21–24</sup> To improve data interpretability, we used national patient registry data and stratified ASD cases based on presence or absence of co-diagnosed intellectual disability (ID). Despite sharing the majority of their rare variant influences,<sup>7</sup> ID and ASD do not appear to share their common polygenic influences: as currently estimated, the genetic correlation between ID and ASD is not significantly different from zero.<sup>25</sup> Further, evidence suggests reduced SNP heritability for forms of ASD in which co-diagnosed ID is more common.<sup>15,25</sup> As (1) lower heritability predicts lower familial recurrence and (2) ascertained female ASD cases are more likely to have co-diagnosed ID, failing to stratify by ID could render a male-female comparison difficult to interpret. Our recurrence analyses focused on ASD without co-diagnosed ID (from here: *ASDnoID*) and used ID without co-diagnosed ASD (from here: *IDnoASD*) as a negative control. We excluded individuals with diagnoses of both ASD and ID (approximately 15% of ASD cases in Denmark), as there were too few cases in that group for an independent sibling recurrence analysis ( $n = 372$  female cases with at least one sibling). We then complement the epidemiologic analyses with a statistical genetic comparison using multiple members of ASD-affected families and a new ASD PRS from a large, unpublished GWAS meta-analysis.

## RESULTS

### FPE and sibling recurrence

The Danish Psychiatric Central Research Register and the Danish National Patient Register are unique resources, well

sued to careful consideration of sibling recurrence. They are complete until 2012 and 2013, respectively, and contain medical record data on the entire Danish population born between May 1, 1981 and December 31, 2005 ( $n = 1,472,762$ ). We linked the psychiatric and patient registers to find all Danish families with two or more full siblings born during this time period. We identified 94,790 such families. We then identified the families with at least one child with *ASDnoID* or *IDnoASD*. This analysis included all diagnosed *ASDnoID* and *IDnoASD* cases in this population during this period. When a family included more than one affected child, we selected one at random to be the “index case” (from here: cases). We analyzed one sibling per family; if the family included more than one sibling, we selected one at random for inclusion in the analysis. We examined ASD and ID diagnoses in the selected siblings. As the focus of the analysis was recurrence of ASD and ID and any selection among siblings was performed at random, sibling selection was not diagnosis dependent (i.e., if the family included a sibling with ASD and a sibling without, either could be selected, with equal probability). A detailed description of this process can be found in the [STAR Methods: Sibling recurrence of ASD and ID](#).

To investigate the FPE, we examined whether siblings of female cases of *ASDnoID* ( $n = 1,707$  siblings) have higher risk for ASD and/or ID themselves than the siblings of male cases of *ASDnoID* ( $n = 6,270$  siblings). We were adequately powered to examine co-occurring ASD and ID (*ASDandID*) as an outcome in the siblings. In siblings, there were accordingly three potential outcomes: *ASDnoID*, *ASDandID*, and *IDnoASD*. We estimated sibling risk by comparing diagnosis rates in the siblings with diagnosis rates in age- and sex-matched controls, drawn at random from the Danish population. To increase power, we used 2:1 control to case matching. We followed the same procedures for siblings of female cases of *IDnoASD* ( $n = 506$  siblings) and siblings of male cases of *IDnoASD* ( $n = 811$  siblings).

The primary results are presented in [Figure 1](#). An odds ratio (OR) of more than 1 suggests that case siblings were more likely to receive a diagnosis than age- and sex-matched individuals from the general population. Siblings of female *ASDnoID* cases were approximately seven times as likely (OR = 7.19; 95% confidence interval [CI] = 5.09–10.09) to receive a diagnosis of *ASDnoID* themselves than a general population individual. For siblings of male *ASDnoID* cases, there was a nearly 4-fold (OR = 3.76; 95% CI = 3.10–4.54) increase in risk. In fact, while all siblings of *ASDnoID* cases were at increased ASD risk ( $p < 1.34 \times 10^{-4}$  for all comparisons), the siblings of female *ASDnoID* cases were at even greater risk than the siblings of male *ASDnoID* cases ( $p < 0.01$  for both comparisons). This is consistent with expectations of the FPE. We only compared risk between siblings of female and male cases if both sibling groups showed elevated risk against the general population. This is akin to only testing for an interaction in the presence of significant main effects.

The pattern was different for the siblings of *IDnoASD* cases. First, neither siblings of female cases ( $n = 506$ ; *ASDandID*: OR = 2.00, 95% CI = 0.12–32.07; *ASDnoID*: OR = 2.01, 95% CI = 0.80–5.12) nor siblings of male cases ( $n = 811$ ; *ASDandID*: OR = 6.02, 95% CI = 0.63–57.95; *ASDnoID*: OR = 1.49, 95% CI = 0.79–2.80) showed increased risk for ASD (with or without

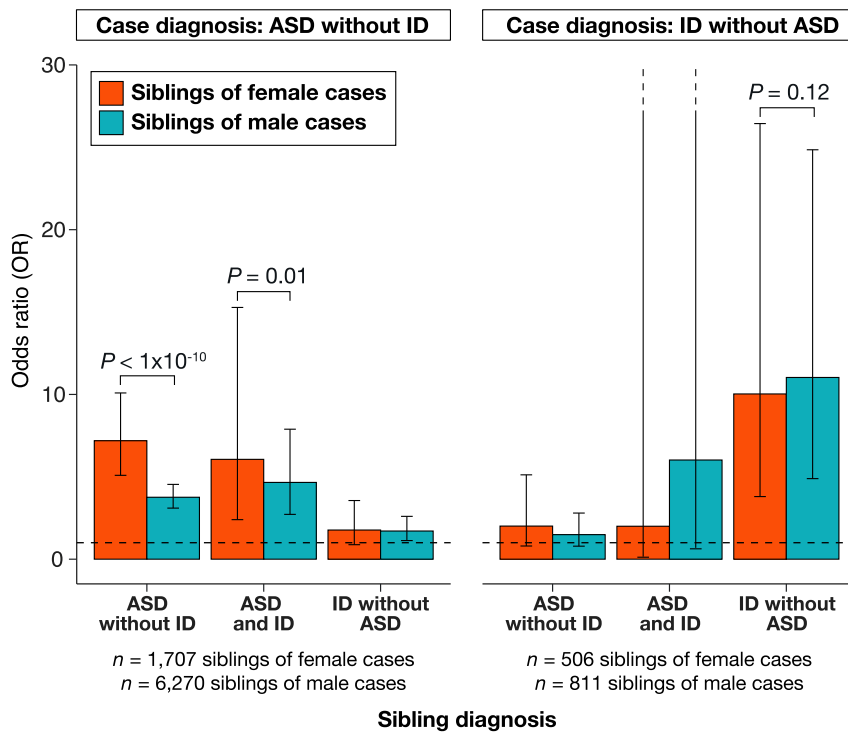

**Figure 1. Sibling recurrence of ASD and ID**

Red bars represent odds ratios (ORs) for siblings of female cases, and teal bars represent ORs for siblings of male cases. ORs indicate the increase in risk for each diagnosis among siblings of cases, as compared with age- and sex-matched controls, derived from logistic regression (STAR Methods; Sibling recurrence of ASD and ID). Error bars represent 95% confidence intervals. p values are from a Wald test to determine whether ORs are significantly different from one another. p values for the male-female comparison were only calculated when both ORs were significantly different from 1. Underlying data are in Tables S1 and S2.

co-diagnosed ID) at these sample sizes. As increased risk for ASD could not be detected, we did not test for a difference in ASD risk between siblings of female versus male *IDnoASD* cases. The siblings of *IDnoASD* cases were, however, at significantly increased risk for *IDnoASD* themselves ( $p < 3.13 \times 10^{-6}$  for both comparisons). This was true for both siblings of male cases and the siblings of female cases. Sibling risk of *IDnoASD* recurrence did not significantly differ by the sex of the *IDnoASD* case ( $p = 0.12$ ).

We were not statistically powered to simultaneously consider sex of the case and sex of the sibling. However, in an analysis of risk to male versus female siblings of all ASD cases, risk did not differ meaningfully by sex of the sibling when using a sex-specific general population rate (Figure S1; Table S8; STAR Methods: Sibling recurrence of ASD and ID; Methods S1: Sibling recurrence of ASD and ID, by sibling sex).

### FPE and ASD parents

We next examined the FPE in two genetically characterized ASD cohorts: the Simons Simplex Collection (SSC)<sup>26</sup> and the Simons Foundation Powering Autism Research for Knowledge (SPARK) cohort.<sup>27,28</sup> The SSC consists of families with one affected child and two confirmed unaffected parents. SPARK includes families with a variety of structures.

Parent-child designs present an opportunity to examine the role of the FPE in parents of cases, as well as in ASD cases themselves. We expect parents of ASD cases to have greater than average risk for ASD, simply because they have a child with ASD. The parents, however, are usually categorically unaffected. Some ASD studies, like the SSC, screened parents for ASD and ASD-like symptomatology. If a parent met criteria for an ASD diagnosis or had an

obvious and substantial concentration of ASD-like traits, the family could not participate in the study.<sup>26</sup> Families with ASD-diagnosed parents can participate in SPARK, but we excluded these families from our analysis. SPARK parents remaining in the analysis could still have a substantial aggregation of ASD symptomatology.

We expect mothers and fathers of children with ASD to carry elevated ASD risk relative to the general population. To estimate this increased risk, we integrated the SSC and

SPARK data with a large general population cohort, the UK Biobank (UKB).<sup>29</sup> Using standard deviations (SDs) on the UKB ASD PRS distribution as our scale, we then estimated the burden of common polygenic risk for ASD in all European ancestry parents in SPARK and SSC, as well as in ancestry-matched controls from UKB, controlling for the first 15 principal components (PCs) of ancestry. As expected, parents of ASD cases carried more genetic risk for ASD than controls (0.23 SD;  $p = 1.9 \times 10^{-7}$ ; Figure 2).

Under an FPE model, mothers would, on average, be able to carry more ASD risk than fathers before meeting ASD case criteria. Consistent with FPE expectations, we found that mothers of ASD cases carried significantly more polygenic risk for ASD than fathers of ASD cases ( $n = 7,436$  mothers;  $n = 5,926$  fathers; 0.09 SD;  $p = 7.0 \times 10^{-7}$ ; Figure 2). The increase in ASD PRS in ASD mothers compared with females in the general population was about 50% greater than the increase in ASD PRS in ASD fathers compared with males in the general population. This mother-father difference is present independently in both SSC ( $n = 2,061$  mothers;  $n = 2,079$  fathers; 0.08 SD;  $p = 8.0 \times 10^{-3}$ ) and SPARK ( $n = 5,375$  mothers;  $n = 3,847$  fathers; 0.09 SD;  $p = 5.2 \times 10^{-5}$ ). It is also present when comparing full trios: families where both parents are present in the dataset ( $n = 4,809$  complete trios;  $p = 1.4 \times 10^{-5}$ ). Further, while ASD cases had significantly greater PRS for ASD than their unaffected mothers on average ( $n = 7,628$ ; 0.09 SD;  $p = 1.2 \times 10^{-8}$ ; Figure 2), that elevation was strikingly similar to the elevation observed between mothers and fathers. At this sample size, there is no sex difference in ASD PRS in UKB ( $p = 0.15$ ). This is expected of any population sample when using an autosomally constructed PRS.

Finally, we compared the polygenic burden of male and female ASD probands, controlling for comorbid ID (STAR

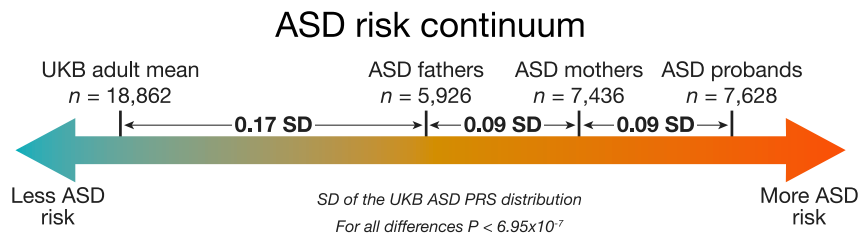

**Figure 2. The continuum of ASD polygenic risk in the general population and families with an ASD case**

Between-group differences in polygenic score for ASD and p values from linear regression comparing group polygenic scores while controlling for 15 principal components of ancestry. ASD groups are combined across the SSC and SPARK collections. Autosomal polygenic risk scores were calculated using weights from a GWAS of ASD cases ( $n = 19,870$ ) and controls ( $n = 39,078$ ) from the iPSYCH

consortium in Denmark (STAR Methods: Generation of polygenic risk score). Group differences are standardized using the UK Biobank ASD PRS distribution. Underlying data are in Tables S3–S6.

**Methods: Polygenic risk comparisons**). As a greater fraction of female probands have comorbid ID, ID could otherwise confound this comparison. We thus restricted the analysis to probands with measured IQ and defined ID as full-scale IQ < 70 in SSC or a notation of “cognitive impairment” in SPARK. As expected under a FPE, we observed nominally higher ASD polygenic burden in female compared with male probands (0.08 SD;  $p = 0.03$ ;  $n = 789$  male probands with ID;  $n = 230$  female probands with ID;  $n = 3,422$  male probands without ID;  $n = 662$  female probands without ID).

#### FPE and the polygenic transmission disequilibrium test (pTDT)

The pTDT compares polygenic risk between parents and their children. It leverages the expectation that, in a random sample of parent-child trios, the mean of the children’s PRS for any trait will equal the mean of the mid-parent PRS (defined as the average of the mothers’ and fathers’ PRSs). Ascertainment for a phenotypic deviation between children and parents, for example, sampling children with ASD and parents without ASD, breaks that expectation and allows one to identify polygenic risk factors that are associated with the ascertained outcome. We have previously shown that children with ASD, on average, substantially over-inherit their parents’ polygenic risk for ASD, as well as for schizophrenia and increased educational attainment.<sup>4</sup>

Larger ASD datasets, in conjunction with a new and better-powered ASD PRS, allow us to revisit pTDT in light of the differential parental polygenic risk (Figure 2). The difference in average ASD PRS between case mothers and case fathers changes our understanding of the mid-parent PRS. On average, male siblings of children with ASD are now expected to inherit more risk for ASD than is carried by their fathers (Figure 3). To the extent that the mean difference in parental PRS reflects a sex difference in ASD risk tolerance, male siblings have substantially increased risk compared with female siblings. The difference in ASD PRS between ASD case mothers and fathers should be better tolerated in female siblings than in male siblings. The average mid-parent risk is less than the average risk carried by unaffected mothers of ASD cases, meaning females can tolerate higher risk than that expected in female siblings.

To investigate the FPE throughout families affected by ASD, we identified families in SSC and SPARK that include (1) an affected child, (2) two unaffected parents, and (3) an unaffected sibling and performed pTDT on male and female unaffected siblings ( $n = 1,519$  males;  $n = 1,611$  females; STAR Methods:

**Polygenic risk comparisons**). We found that male unaffected siblings significantly under-inherit their parents’ polygenic risk for ASD ( $p = 0.03$ ; Figure 3). This is consistent with an average requirement for their PRS to decline from the mid-parental PRS to around that of their unaffected fathers, in order to remain unaffected themselves. We did not see a deviation from expectation in female siblings ( $p = 0.39$ ; Figure 3). While this is consistent with the FPE, the difference in transmission between male and female siblings is not statistically significant and should be re-investigated with larger samples.

We used exome sequence data from SSC and SPARK to identify the subset of ASD cases carrying a high-impact *de novo* variant, specifically predicted to disrupt the function of a constrained gene (12% of cases across both cohorts; see STAR Methods: *De novo variant analysis*). We hypothesized that high-impact *de novo* variants and the FPE create differences in the amount of liability space remaining to be filled by common polygenic variation. These differences may create the following ordering of polygenic over transmission (lowest to highest): (1) male cases with a high-impact *de novo* variant ( $n = 436$ ), (2 and 3) either female cases with a high-impact *de novo* variant ( $n = 159$ ) or male cases without a high-impact *de novo* variant ( $n = 3,468$ ), and (4) female cases without a high-impact *de novo* variant ( $n = 757$ ).

The pTDT results reflected this expected gradient (Figure 3). Male probands with high-impact *de novo* variants had the lowest polygenic over-inheritance (0.08 SD;  $p = 0.10$ ), which was not significantly different from mid-parent expectation and was similar to that of their unaffected mothers (0.06 SD from the mid-parent value). Female cases without a high-impact *de novo* variant had nearly three times the polygenic over-inheritance (0.23 SD;  $p = 7.82 \times 10^{-11}$ ) of male cases with a high-impact *de novo* variant ( $p = 0.02$ ).

#### DISCUSSION

Evidence from multiple types of genetic risk, and multiple members of families affected by ASD, supports a FPE model, in which females have a higher liability threshold for receiving a diagnosis of ASD. We note that, in this analysis, female protection and male risk are one and the same. With only two categories and no insight into mechanism, they are in fact indistinguishable. We also note that polygenic risk for ASD is, in the general population, associated with many positive traits.<sup>4,15,30</sup> Dozens of studies have noted a positive, general population correlation between polygenic risk for ASD and greater educational attainment,



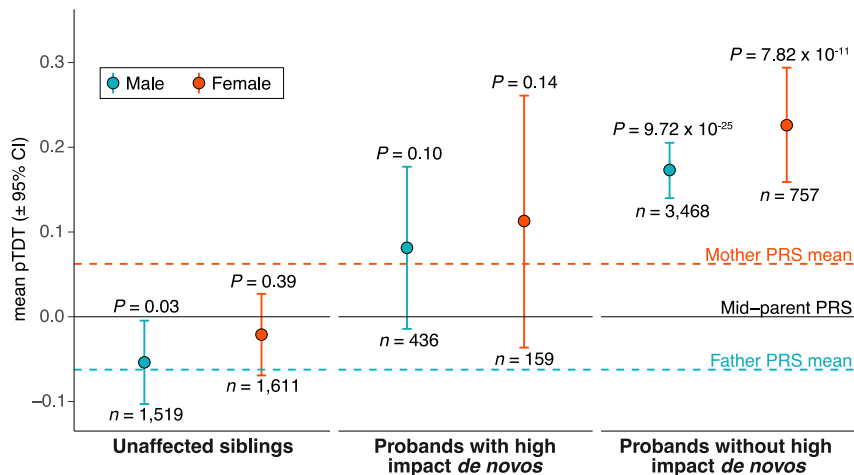

**Figure 3. Polygenic transmission disequilibrium in ASD cases and unaffected siblings**

Transmission disequilibrium standardized to the mid-parent PRS distribution with error bars denoting 95% confidence intervals. p values are from a two-sided, one-sample t test and estimate the probability that polygenic deviation is equal to 0. Cases and controls are combined across SSC and SPARK cohorts. The mother and father PRS mean lines are the mean values from pTDT of each parent against the mid-parent expectation (symmetric by definition). Summary statistics for the PRS are from a GWAS of ASD cases ( $n = 19,870$ ) and controls ( $n = 39,078$ ) from the iPSYCH consortium in Denmark (STAR Methods: Danish ASD GWAS). Underlying data are in Table S7.

stronger reasoning ability, and many other beneficial attributes in a cognitively demanding economy. In females, the ability to tolerate more ASD risk without manifesting some of the more isolating elements of diagnosed ASD can benefit individuals, families, and communities. While one may be tempted to quantify a formal expectation of ASD's genetic architecture under specified circumstances (e.g., female with a high-impact *de novo* variant; male without), such expectations would depend on a stable, or at least fairly predictable, phenotype. ASD, as currently diagnosed, is neither. There are predictable elements of sex by phenotype interaction in diagnosed cases, for example, escalating male-to-female ratio with increasing case IQ.<sup>31</sup> However, even after conditioning on IQ, one is left with residual phenotypic associations to sex among ascertained cases. For example, females are on average diagnosed later than males.<sup>20</sup> Similarly, sex differences in genetic architecture remain after conditioning on presence or absence of a strong acting *de novo* variant. Across individuals with ASD, *de novo* variant count is associated with variant impact: as *de novo* variant count increases, so does their average effect size contribution to ASD.<sup>4</sup> Fewer of the variants are benign; more are likely clinically returnable.

Further, one must make several assumptions in order to easily interpret a PRS comparison between male and female cases. For example, one must assume equivalent genetic architecture between ASD as diagnosed in males (male ASD) and as diagnosed in females (female ASD). The previously described differences in rare variant burden, along with preliminary evidence from studies of SNP heritability, already violate that assumption.<sup>5–8,15</sup> In addition, one needs to assume that male ASD and female ASD have equivalent polygenic influences (a genetic correlation of 1). This is unclear at current sample sizes.<sup>15</sup> Even once that analysis becomes adequately powered, the correlation will be difficult to interpret. The male-to-female ratio in ASD increases with increasing case IQ, and this brings with it additional average differences in behavioral, cognitive, and medical comorbidities.<sup>19</sup> Any estimated genetic correlation between male and female ASD could accordingly conflate sex-based and phenotype-based heterogeneity.

We do not know what renders females more tolerant of ASD's genetic risk factors or what, if anything, the mechanisms underlying that tolerance have in common with ASD genetic risk. Analysis at the molecular level will be necessary to address that question. At the statistical level, assuming adequate phenotypic stability and characterization, increasing sample sizes will lead to increasingly clear male-female differences. Future studies can further explore this axis of heterogeneity in ASD.

#### Limitations of the study

This study has several limitations. The true ID rate in ASD cases in Denmark is likely higher than reported. If consistent with the rate of ID in ASD cases in the United States or the United Kingdom, it would be approximately 40% over this diagnostic period.<sup>20</sup> ID in the context of ASD is often underreported in medical record and registry data, as it is rarely prescription associated. If comorbid ID was in fact present in “ASD no ID” index cases, we would expect their siblings to be more likely to receive a diagnosis, which would increase overall recurrence rates among siblings and bias our results toward the null hypothesis. We could not attempt to identify additional individuals with ID through information on educational attainment, standardized testing, or assessments of cognitive performance, as these are not linked to the Danish medical registry. We are also limited by the relative scarcity of *IDnoASD* diagnoses in this dataset. A recent nationally comprehensive survey of the Danish registry data noted that, by age 18, the cumulative incidence of ID diagnoses in males (1.5%) is lower than the cumulative incidence of ASD diagnoses in females (1.9%).<sup>32</sup> Our exclusion of case children with both ID and ASD, along with the analytic requirement for two-child families, rendered the *IDnoASD* analyses small in comparison to those focused on ASD alone.

It is worth noting that the influences on differential rates of ASD diagnosis are clearly multifactorial, extending beyond solely genetic influence. One well-known influence is diagnostic bias, which may occur for many reasons, including societal norms of behavior, bias in assessment tools, the sex of evaluators, misdiagnosis of female cases, better “masking” of autistic traits in

females, and sex differences in internal and externalizing features of autism.<sup>3,33</sup>

## STAR★METHODS

Detailed methods are provided in the online version of this paper and include the following:

- **KEY RESOURCES TABLE**
- **RESOURCE AVAILABILITY**
  - Lead contact
  - Materials availability
  - Data and code availability
- **EXPERIMENTAL MODEL AND SUBJECT DETAILS**
  - Simons simplex collection (SSC)
  - Simons foundation powering autism research for knowledge (SPARK)
  - UK Biobank
  - iPSYCH
- **METHOD DETAILS**
  - Identifying families in Danish registry data
  - Sibling recurrence of ASD and ID
  - Danish genotype data imputation
  - Danish ASD GWAS
  - SSC imputation
  - SPARK imputation
  - *De novo* variant analysis
  - Ancestry definition in SSC, SPARK and UKB
  - Generation of polygenic risk score
  - Polygenic risk comparisons
- **QUANTIFICATION AND STATISTICAL ANALYSIS**

## SUPPLEMENTAL INFORMATION

Supplemental information can be found online at <https://doi.org/10.1016/j.xgen.2022.100134>.

## ACKNOWLEDGMENTS

This work was supported by the Autism Science Foundation and Hillbrant Family Foundation (ASP 001 to S.J.S., ASP 002 to S.L.B., and ASP 003 to E.B.R.), the NIMH (RMH111813A to E.B.R., U01MH111662 to S.J.S., and F30MH129009 to D.J.W.), and the NLM (T15LM007092 to D.J.W.). The iPSYCH team was supported by grants from the Lundbeck Foundation (R102-A9118, R155-2014-1724, and R248-2017-2003), the EU H2020 Program (grant no. 667302; “CoCA” to A.D.B.), NIMH (1U01MH109514-01 to A.D.B.), and the Universities and University Hospitals of Aarhus and Copenhagen. The Danish National Biobank resource was supported by the Novo Nordisk Foundation. High-performance computer capacity for handling and statistical analysis of iPSYCH data on the GenomeDK HPC facility was provided by the Center for Genomics and Personalized Medicine and the Center for Integrative Sequencing, iSEQ, Aarhus University, Denmark (grant to A.D.B.). This research has been conducted using data from UK Biobank, a major biomedical database, under project 31063. This study was reviewed and approved by Partners Human Research of Partners HealthCare. The study name is Molecular Study of Cognitive and Behavioral Variation (IRB: 2015P002376), and the Principal Investigator is Elise Robinson. The authors would like to deeply thank all participants in the cohorts included in this analysis and Luke O’Connor for helpful comments.

## AUTHOR CONTRIBUTIONS

E.M.W., D.J.W., J.G., A.R., J.M.F., W.K.T., C.E.C., N.B., C.v.d.M., R.K.W., F.K.S., D.S.P., and J.B.-G. conducted data analysis, data curation, and quality control. E.M.W., D.J.W., and E.B.R. wrote the manuscript. D.M.H., P.B.M., M.J.D., M.E.T., A.D.B., and E.B.R. supervised data analysis. E.M.W., D.J.W., S.J.S., S.L.B., and E.B.R. designed the study. The members of the iPSYCH Consortium include Thomas Werge, Ole Mors, Merete Nordentoft, Thomas D. Als, and Marie Bækvad-Hansen.

## DECLARATION OF INTERESTS

D.S.P. was an employee of Genomics plc. All the analyses reported in this paper were performed as part of D.S.P.’s previous employment at the Analytic and Translational Genetics Unit, Department of Medicine, Massachusetts General Hospital, Boston, MA, USA and Stanley Center for Psychiatric Research, Broad Institute of MIT and Harvard, Cambridge, MA, USA. All other authors declare no competing interests.

Received: July 14, 2021  
Revised: February 26, 2022  
Accepted: April 27, 2022  
Published: June 8, 2022

## SUPPORTING CITATIONS

The following references appear in the supplemental information: Staples et al.,<sup>59</sup> Cann et al.,<sup>60</sup> Rosenberg et al.,<sup>61</sup> Rosenberg et al.,<sup>62</sup> Bergstrom et al.,<sup>63</sup> and O’Connell et al.,<sup>64</sup>.

## REFERENCES

1. Baron-Cohen, S., Scott, F.J., Allison, C., Williams, J., Bolton, P., Matthews, F.E., and Brayne, C. (2009). Prevalence of autism-spectrum conditions: UK school-based population study. *Br. J. Psychiat.* *194*, 500–509. <https://doi.org/10.1192/bjp.bp.108.059345>.
2. Fombonne, E. (2007). *Epidemiological surveys of pervasive developmental disorders*. In *Autism and Pervasive Developmental Disorders* (Cambridge University Press), pp. 33–68.
3. Loomes, R., Hull, L., and Mandy, W.P.L. (2017). What is the male-to-female ratio in autism spectrum disorder? A systematic review and meta-analysis. *J. Am. Acad. Child. Adolesc. Psychiat.* *56*, 466–474. <https://doi.org/10.1016/j.jaac.2017.03.013>.
4. Weiner, D.J., Wigdor, E.M., Ripke, S., Walters, R.K., Kosmicki, J.A., Grove, J., Samocha, K.E., Goldstein, J.I., Okbay, A., Bybjerg-Grauholm, J., et al. (2017). Polygenic transmission disequilibrium confirms that common and rare variation act additively to create risk for autism spectrum disorders. *Nat. Genet.* *49*, 978–985. <https://doi.org/10.1038/ng.3863>.
5. Sanders, S.J., Murtha, M.T., Gupta, A.R., Murdoch, J.D., Raubeson, M.J., Willsey, A.J., Ercan-Sencicek, A.G., DiLullo, N.M., Parikshak, N.N., Stein, J.L., et al. (2012). *De novo* mutations revealed by whole-exome sequencing are strongly associated with autism. *Nature* *485*, 237–241. <https://doi.org/10.1038/nature10945>.
6. Sanders, S.J., He, X., Willsey, A.J., Ercan-Sencicek, A.G., Samocha, K.E., Cicek, A.E., Murtha, M.T., Bal, V.H., Bishop, S.L., Dong, S., et al. (2015). Insights into autism spectrum disorder genomic architecture and Biology from 71 risk loci. *Neuron* *87*, 1215–1233. <https://doi.org/10.1016/j.neuron.2015.09.016>.
7. Satterstrom, F.K., Kosmicki, J.A., Wang, J., Breen, M.S., De Rubeis, S., An, J.-Y., Peng, M., Collins, R., Grove, J., Klei, L., et al. (2020). Large-scale exome sequencing study implicates both developmental and functional changes in the neurobiology of autism. *Cell* *180*, 568–584. <https://doi.org/10.1016/j.cell.2019.12.036>.
8. Sanders, S.J., Ercan-Sencicek, A.G., Hus, V., Luo, R., Murtha, M.T., Moreno-De-Luca, D., Chu, S.H., Moreau, M.P., Gupta, A.R., Thomson, S.A.,

- et al. (2011). Multiple recurrent de novo CNVs, including duplications of the 7q11.23 Williams syndrome region, are strongly associated with autism. *Neuron* 70, 863–885. <https://doi.org/10.1016/j.neuron.2011.05.002>.
9. Satterstrom, F.K., Walters, R.K., Singh, T., Wigdor, E.M., Lescai, F., Demontis, D., Kosmicki, J.A., Grove, J., Stevens, C., Bybjerg-Grauholm, J., et al. (2019). Autism spectrum disorder and attention deficit hyperactivity disorder have a similar burden of rare protein-truncating variants. *Nat. Neurosci.* 22, 1961–1965. <https://doi.org/10.1038/s41593-019-0527-8>.
  10. Ronemus, M., lossifov, I., Levy, D., and Wigler, M. (2014). The role of de novo mutations in the genetics of autism spectrum disorders. *Nat. Rev. Genet.* 15, 133–141. <https://doi.org/10.1038/nrg3585>.
  11. lossifov, I., O’Roak, B.J., Sanders, S.J., Ronemus, M., Krumm, N., Levy, D., Stessman, H.A., Witherspoon, K.T., Vives, L., Patterson, K.E., et al. (2014). The contribution of de novo coding mutations to autism spectrum disorder. *Nature* 515, 216–221. <https://doi.org/10.1038/nature13908>.
  12. Jacquemont, S., Coe, B.P., Hersch, M., Duyzend, M.H., Krumm, N., Bergmann, S., Beckmann, J.S., Rosenfeld, J.A., and Eichler, E.E. (2014). A higher mutational burden in females supports a “female protective model” in neurodevelopmental disorders. *Am. J. Hum. Genet.* 94, 415–425. <https://doi.org/10.1016/j.ajhg.2014.02.001>.
  13. Zhang, Y., Li, N., Li, C., Zhang, Z., Teng, H., Wang, Y., Zhao, T., Shi, L., Zhang, K., Xia, K., et al. (2020). Genetic evidence of gender difference in autism spectrum disorder supports the female-protective effect. *Transl. Psychiat.* 10, 4–10. <https://doi.org/10.1038/s41398-020-0699-8>.
  14. Gaugler, T., Klei, L., Sanders, S.J., Bodea, C.A., Goldberg, A.P., Lee, A.B., Mahajan, M., Manaa, D., Pawitan, Y., Reichert, J., et al. (2014). Most genetic risk for autism resides with common variation. *Nat. Genet.* 46, 881–885. <https://doi.org/10.1038/ng.3039>.
  15. Grove, J., Ripke, S., Als, T.D., Mattheisen, M., Walters, R.K., Won, H., Pallesen, J., Agerbo, E., Andreassen, O.A., Anney, R., et al. (2019). Identification of common genetic risk variants for autism spectrum disorder. *Nat. Genet.* 51, 431–444. <https://doi.org/10.1038/s41588-019-0344-8>.
  16. Antaki, D., Maihofer, A., Klein, M., Guevara, J., Grove, J., Carey, C., Hong, O., Arranz, M.J., Hervas, A., Corsello, C., et al. (2021). A phenotypic spectrum of autism is attributable to the combined effects of rare variants, polygenic risk and sex. Preprint at medRxiv. <https://doi.org/10.1101/2021.03.30.21254657>.
  17. Robinson, E.B., Lichtenstein, P., Anckarsäter, H., Happé, F., and Ronald, A. (2013). Examining and interpreting the female protective effect against autistic behavior. *Proc. Natl. Acad. Sci. U S A* 110, 5258–5262. <https://doi.org/10.1073/pnas.1211070110>.
  18. Boat, T.F., and Wu, J.T. Committee to Evaluate the Supplemental Security Income Disability Program for Children with Mental Disorders, Board on the Health of Select Populations, Board on Children, Youth, and Families; Institute of Medicine, Division of Behavioral and Social Sciences and Education, and The National Academies of Sciences, Engineering, and Medicine (2015). Prevalence of autism spectrum disorder. In *Mental Disorders and Disabilities Among Low-Income Children* (National Academies Press (US)), pp. 241–265.
  19. Fombonne, E. (2003). Epidemiological surveys of autism and other pervasive developmental disorders: an update. *J. Autism Dev. Disord.* 33, 365–382. <https://doi.org/10.1023/a:1025054610557>.
  20. Maenner, M.J., Shaw, K.A., Baio, J., Washington, A., Washington, A., Patrick, M., DiRienzo, M., Christensen, D.L., Wiggins, L.D., Andrews, J.G., et al. (2020). Prevalence of autism spectrum disorder among children aged 8 Years - autism and developmental disabilities monitoring network, 11 sites, United States, 2016. *MMWR Surveill. Summ.* 69, 1–12. <https://doi.org/10.15585/mmwr.ss6904a1>.
  21. Sandin, S., Lichtenstein, P., Kuja-Halkola, R., Larsson, H., Hultman, C.M., and Reichenberg, A. (2014). The familial risk of autism. *JAMA* 311, 1770–1777. <https://doi.org/10.1001/jama.2014.4144>.
  22. Bai, D., Marrus, N., Yip, B.H.K., Reichenberg, A., Constantino, J.N., and Sandin, S. (2020). Inherited risk for autism through maternal and paternal lineage. *Biol. Psychiat.* 88, 480–487. <https://doi.org/10.1016/j.biopsych.2020.03.013>.
  23. Xie, S., Karlsson, H., Dalman, C., Widman, L., Rai, D., Gardner, R.M., Magnusson, C., Sandin, S., Tabb, L.P., Newschaffer, C.J., and Lee, B.K. (2020). The familial risk of autism spectrum disorder with and without intellectual disability. *Autism Res.* 13, 2242–2250. <https://doi.org/10.1002/aur.2417>.
  24. Palmer, N., Beam, A., Agniel, D., Eran, A., Manrai, A., Spettell, C., Steinberg, G., Mandl, K., Fox, K., Nelson, S.F., and Kohane, I. (2017). Association of sex with recurrence of autism spectrum disorder among siblings. *JAMA Pediatr.* 171, 1107–1112. <https://doi.org/10.1001/jama-pediatrics.2017.2832>.
  25. Niemi, M.E.K., Martin, H.C., Rice, D.L., Gallone, G., Gordon, S., Kelemen, M., McAloney, K., McRae, J., Radford, E.J., Yu, S., et al. (2018). Common genetic variants contribute to risk of rare severe neurodevelopmental disorders. *Nature* 562, 268–271. <https://doi.org/10.1038/s41586-018-0566-4>.
  26. Fischbach, G.D., and Lord, C. (2010). The Simons Simplex Collection: a resource for identification of autism genetic risk factors. *Neuron* 68, 192–195. <https://doi.org/10.1016/j.neuron.2010.10.006>.
  27. SPARK; A. (2018). US cohort of 50,000 families to accelerate autism research. *Neuron* 97, 488–493.
  28. Feliciano, P., Zhou, X., Astrovskaya, I., Turner, T.N., Wang, T., Brueggeman, L., Barnard, R., Hsieh, A., Snyder, L.G., Muzny, D.M., et al. (2019). Exome sequencing of 457 autism families recruited online provides evidence for autism risk genes. *NPJ Genom Med.* 4, 19. <https://doi.org/10.1038/s41525-019-0093-8>.
  29. Bycroft, C., Freeman, C., Petkova, D., Band, G., Elliott, L.T., Sharp, K., Motyer, A., Vukcevic, D., Delaneau, O., O’Connell, J., et al. (2018). The UK Biobank resource with deep phenotyping and genomic data. *Nature* 562, 203–209. <https://doi.org/10.1038/s41586-018-0579-z>.
  30. Hagenaars, S.P., METASTROKE Consortium, International Consortium for Blood Pressure GWAS; Harris, S.E., Davies, G., Hill, W.D., Liewald, D.C.M., Ritchie, S.J., Marioni, R.E., Cullen, B., Fawns-Ritchie, C., Malik, R., et al. (2016). Shared genetic aetiology between cognitive functions and physical and mental health in UK Biobank (N=112 151) and 24 GWAS consortia. *Mol. Psychiat.* 21, 1624–1632. <https://doi.org/10.1038/mp.2015.225>.
  31. Fombonne, E., MacFarlane, H., and Salem, A.C. (2021). Epidemiological surveys of ASD: advances and remaining challenges. *J. Autism Dev. Disord.* 51, 4271–4290. <https://doi.org/10.1007/s10803-021-05005-9>.
  32. Dalsgaard, S., Thorsteinsson, E., Trabjerg, B.B., Schullehner, J., Plana-Ripoll, O., Brikell, I., Wimberley, T., Thygesen, M., Madsen, K.B., Timmerman, A., et al. (2020). Incidence rates and cumulative incidences of the full spectrum of diagnosed mental disorders in childhood and adolescence. *JAMA Psychiat.* 77, 155–164. <https://doi.org/10.1001/jamapsychiatry.2019.3523>.
  33. Kreiser, N.L., and White, S.W. (2013). ASD in females: are we overstating the gender difference in diagnosis? *Clin. Child. Fam. Psychol. Rev.* 17, 67–84. <https://doi.org/10.1007/s10567-013-0148-9>.
  34. International HapMap 3 Consortium (2010). Integrating common and rare genetic variation in diverse human populations. *Nature* 467, 52–58. <https://doi.org/10.1038/nature09298>.
  35. Cavalli-Sforza, L.L. (2005). The human genome diversity Project: past, present and future. *Nat. Rev. Genet.* 6, 333–340. <https://doi.org/10.1038/nrg1596>.
  36. Alexander, D.H., Novembre, J., and Lange, K. (2009). Fast model-based estimation of ancestry in unrelated individuals. *Genome Res.* 19, 1655–1664. <https://doi.org/10.1101/gr.094052.109>.
  37. Loh, P.-R., Palamara, P.F., and Price, A.L. (2016). Fast and accurate long-range phasing in a UK Biobank cohort. *Nat. Genet.* 48, 811–816. <https://doi.org/10.1038/ng.3571>.



38. Price, A.L., Patterson, N.J., Plenge, R.M., Weinblatt, M.E., Shadick, N.A., and Reich, D. (2006). Principal components analysis corrects for stratification in genome-wide association studies. *Nat. Genet.* 38, 904–909. <https://doi.org/10.1038/ng1847>.
39. Galinsky, K.J., Bhatia, G., Loh, P.-R., Georgiev, S., Mukherjee, S., Patterson, N.J., and Price, A.L. (2016). Fast principal-component analysis reveals convergent evolution of ADH1B in Europe and East Asia. *Am. J. Hum. Genet.* 98, 456–472. <https://doi.org/10.1016/j.ajhg.2015.12.022>.
40. Howie, B.N., Donnelly, P., and Marchini, J. (2009). A flexible and accurate genotype imputation method for the next generation of genome-wide association studies. *PLoS Genet.* 5, e1000529. <https://doi.org/10.1371/journal.pgen.1000529>.
41. Vilhjálmsson, B.J., Yang, J., Finucane, H.K., Gusev, A., Lindström, S., Ripke, S., Genovese, G., Loh, P.-R., Bhatia, G., Do, R., et al. (2015). Modeling linkage disequilibrium increases accuracy of polygenic risk scores. *Am. J. Hum. Genet.* 97, 576–592. <https://doi.org/10.1016/j.ajhg.2015.09.001>.
42. Willer, C.J., Li, Y., and Abecasis, G.R. (2010). METAL: fast and efficient meta-analysis of genomewide association scans. *Bioinformatics* 26, 2190–2191. <https://doi.org/10.1093/bioinformatics/btq340>.
43. Das, S., Forer, L., Schönherr, S., Sidore, C., Locke, A.E., Kwong, A., Vrieze, S.I., Chew, E.Y., Levy, S., McGue, M., et al. (2016). Next-generation genotype imputation service and methods. *Nat. Genet.* 48, 1284–1287. <https://doi.org/10.1038/ng.3656>.
44. Walters, R.K., Polimanti, R., Johnson, E.C., McClintick, J.N., Adams, M.J., Adkins, A.E., Aliev, F., Bacanu, S.A., Batzler, A., Bertelsen, S., et al. (2018). Transancestral GWAS of alcohol dependence reveals common genetic underpinnings with psychiatric disorders. *Nat. Neurosci.* 21, 1656–1669. <https://doi.org/10.1038/s41593-018-0275-1>.
45. Chang, C.C., Chow, C.C., Tellier, L.C., Vattikuti, S., Purcell, S.M., and Lee, J.J. (2015). Second-generation PLINK: rising to the challenge of larger and richer datasets. *Gigascience* 4, 7. <https://doi.org/10.1186/s13742-015-0047-8>.
46. Staples, J., Qiao, D., Cho, M.H., Silverman, E.K., Nickerson, D.A., and Below, J.E.; University of Washington Center for Mendelian Genomics (2014). PRIMUS: rapid reconstruction of pedigrees from genome-wide estimates of identity by descent. *Am. J. Hum. Genet.* 95, 553–564. <https://doi.org/10.1016/j.ajhg.2014.10.005>.
47. Lam, M., Awasthi, S., Watson, H.J., Goldstein, J., Panagiotaropoulou, G., Trubetskoy, V., Karlsson, R., Frei, O., Fan, C.-C., De Witte, W., et al. (2020). RICOPIIL: rapid imputation for Consortiums of Population Line. *Bioinformatics* 36, 930–933. <https://doi.org/10.1093/bioinformatics/btz633>.
48. Delaneau, O., Marchini, J., and Zagury, J.-F. (2011). A linear complexity phasing method for thousands of genomes. *Nat. Methods* 9, 179–181. <https://doi.org/10.1038/nmeth.1785>.
49. Pedersen, C.B., Bybjerg-Grauholm, J., Pedersen, M.G., Grove, J., Agerbo, E., Bækvad-Hansen, M., Poulsen, J.B., Hansen, C.S., McGrath, J.J., Als, T.D., et al. (2018). The iPSYCH2012 case-cohort sample: new directions for unravelling genetic and environmental architectures of severe mental disorders. *Mol. Psychiatr.* 23, 6–14. <https://doi.org/10.1038/mp.2017.196>.
50. Bybjerg-Grauholm, J., Pedersen, C.B., Bækvad-Hansen, M., Pedersen, M.G., Adamsen, D., Hansen, C.S., Agerbo, E., Grove, J., Als, T.D., Schork, A.J., et al. (2020). The iPSYCH2015 Case-Cohort sample: updated directions for unravelling genetic and environmental architectures of severe mental disorders. Preprint at medRxiv. <https://doi.org/10.1101/2020.11.30.20237768>.
51. Loh, P.-R., Danecek, P., Palamara, P.F., Fuchsberger, C., A Reshef, Y., K Finucane, H., Schoenherr, S., Forer, L., McCarthy, S., Abecasis, G.R., et al. (2016). Reference-based phasing using the haplotype reference consortium panel. *Nat. Genet.* 48, 1443–1448. <https://doi.org/10.1038/ng.3679>.
52. McCarthy, S., Das, S., Kretzschmar, W., Delaneau, O., Wood, A.R., Teumer, A., Kang, H.M., Fuchsberger, C., Danecek, P., Sharp, K., et al. (2016). A reference panel of 64,976 haplotypes for genotype imputation. *Nat. Genet.* 48, 1279–1283. <https://doi.org/10.1038/ng.3643>.
53. Patterson, N., Price, A.L., and Reich, D. (2006). Population structure and eigenanalysis. *PLoS Genet.* 2, e190. <https://doi.org/10.1371/journal.pgen.0020190>.
54. Price, A.L., Weale, M.E., Patterson, N., Myers, S.R., Need, A.C., Shianna, K.V., Ge, D., Rotter, J.I., Torres, E., Taylor, K.D., et al. (2008). Long-range LD can confound genome scans in admixed populations. *Am. J. Hum. Genet.* 83, 132–135, author reply 135–9. <https://doi.org/10.1016/j.ajhg.2008.06.005>.
55. Begum, F., Ghosh, D., Tseng, G.C., and Feingold, E. (2012). Comprehensive literature review and statistical considerations for GWAS meta-analysis. *Nucleic Acids Res.* 40, 3777–3784. <https://doi.org/10.1093/nar/gkr1255>.
56. Fu, J.M., Kyle Satterstrom, F., Peng, M., Brand, H., Collins, R.L., Dong, S., Klei, L., Stevens, C.R., Cusick, C., Babadi, M., et al. (2021). Rare coding variation illuminates the allelic architecture, risk genes, cellular expression patterns, and phenotypic context of autism. Preprint at medRxiv. <https://doi.org/10.1101/2021.12.20.21267194>.
57. Lek, M., Karczewski, K.J., Minikel, E.V., Samocha, K.E., Banks, E., Fennell, T., O'Donnell-Luria, A.H., Ware, J.S., Hill, A.J., Cummings, B.B., et al. (2016). Analysis of protein-coding genetic variation in 60,706 humans. *Nature* 536, 285–291. <https://doi.org/10.1038/nature19057>.
58. Samocha, K.E., Kosmicki, J.A., Karczewski, K.J., O'Donnell-Luria, A.H., Pierce-Hoffman, E., MacArthur, D.G., Neale, B.M., and Daly, M.J. (2017). Regional missense constraint improves variant deleteriousness prediction. Preprint at bioRxiv. <https://doi.org/10.1101/148353>.
59. Staples, J., Nickerson, D.A., and Below, J.E. (2013). Utilizing graph theory to select the largest set of unrelated individuals for genetic analysis. *Genet. Epidemiol.* 37, 136–141. <https://doi.org/10.1002/gepi.21684>.
60. Cann, H.M., de Toma, C., Cazes, L., Legrand, M.-F., Morel, V., Piouffre, L., Bodmer, J., Bodmer, W.F., Bonne-Tamir, B., Cambon-Thomsen, A., et al. (2002). A human genome diversity cell line panel. *Science* 296, 261–262. <https://doi.org/10.1126/science.296.5566.261b>.
61. Rosenberg, N.A., Pritchard, J.K., Weber, J.L., Cann, H.M., Kidd, K.K., Zhivotovskiy, L.A., and Feldman, M.W. (2002). Genetic structure of human populations. *Science* 298, 2381–2385. <https://doi.org/10.1126/science.1078311>.
62. Rosenberg, N.A., Mahajan, S., Ramachandran, S., Zhao, C., Pritchard, J.K., and Feldman, M.W. (2005). Clines, clusters, and the effect of study design on the inference of human population structure. *PLoS Genet.* 1, e70. <https://doi.org/10.1371/journal.pgen.0010070>.
63. Bergström, A., McCarthy, S.A., Hui, R., Almarri, M.A., Ayub, Q., Danecek, P., Chen, Y., Felkel, S., Hallast, P., Kamm, J., et al. (2020). Insights into human genetic variation and population history from 929 diverse genomes. *Science* 367, eaay5012. <https://doi.org/10.1530/ey.17.14.4>.
64. O'Connell, J., Gurdasani, D., Delaneau, O., Pirastu, N., Ulivi, S., Cocca, M., Traglia, M., Huang, J., Huffman, J.E., Rudan, I., et al. (2014). A general approach for haplotype phasing across the full spectrum of relatedness. *PLoS Genet.* 10, e1004234. <https://doi.org/10.1371/journal.pgen.1004234>.

## STAR★METHODS

### KEY RESOURCES TABLE

| REAGENT or RESOURCE                                        | SOURCE                                                       | IDENTIFIER                                                                                                                                                |
|------------------------------------------------------------|--------------------------------------------------------------|-----------------------------------------------------------------------------------------------------------------------------------------------------------|
| <b>Deposited data</b>                                      |                                                              |                                                                                                                                                           |
| HapMap 3                                                   | The International HapMap 3 Consortium, 2010 <sup>34</sup>    | <a href="ftp://ftp.ncbi.nlm.nih.gov/hapmap/">ftp://ftp.ncbi.nlm.nih.gov/hapmap/</a>                                                                       |
| Human Genome Diversity Project (HGDP)                      | Bergström et al., 2020 <sup>35</sup>                         | <a href="ftp://ngs.sanger.ac.uk/production/hgdp/hgdp_wgs.20190516/">ftp://ngs.sanger.ac.uk/production/hgdp/hgdp_wgs.20190516/</a>                         |
| SFARI-generated genotype array data                        | SFARI                                                        | <a href="https://www.sfari.org/resource/sfari-base/">https://www.sfari.org/resource/sfari-base/</a>                                                       |
| SFARI-generated whole exome sequencing data                | SFARI                                                        | <a href="https://www.sfari.org/resource/sfari-base/">https://www.sfari.org/resource/sfari-base/</a>                                                       |
| UK Biobank genotype array data                             | Bycroft et al., 2018 <sup>29</sup>                           | <a href="https://www.ukbiobank.ac.uk/enable-your-research/apply-for-access">https://www.ukbiobank.ac.uk/enable-your-research/apply-for-access</a>         |
| <b>Software and algorithms</b>                             |                                                              |                                                                                                                                                           |
| ADMIXTURE                                                  | Alexander et al., 2009 <sup>36</sup>                         | <a href="https://dalexander.github.io/admixture/">https://dalexander.github.io/admixture/</a>                                                             |
| Eagle v2.3.5                                               | Loh et al., 2016 <sup>37</sup>                               | <a href="https://www.hsph.harvard.edu/alkes-price/software/">https://www.hsph.harvard.edu/alkes-price/software/</a>                                       |
| EIGENSOFT (including smartPCA)                             | Price et al., 2006<br>Galinsky et al., 2016 <sup>38,39</sup> | <a href="https://www.hsph.harvard.edu/alkes-price/software/">https://www.hsph.harvard.edu/alkes-price/software/</a>                                       |
| Genome Analysis Toolkit (GATK) v4.1.2.0<br>HaplotypeCaller | GATK Team                                                    | <a href="https://hub.docker.com/r/broadinstitute/gatk/">https://hub.docker.com/r/broadinstitute/gatk/</a>                                                 |
| Hail                                                       | <a href="https://hail.is/">https://hail.is/</a>              | <a href="https://github.com/hail-is/hail/">https://github.com/hail-is/hail/</a>                                                                           |
| IMPUTE2                                                    | Howie et al., 2009 <sup>40</sup>                             | <a href="https://mathgen.stats.ox.ac.uk/impute/impute_v2.html">https://mathgen.stats.ox.ac.uk/impute/impute_v2.html</a>                                   |
| LDpred 1.0.11                                              | Vilhjálmsson et al., 2015 <sup>41</sup>                      | <a href="https://github.com/bvilhjal/ldpred">https://github.com/bvilhjal/ldpred</a>                                                                       |
| METAL                                                      | Willer et al., 2010 <sup>42</sup>                            | <a href="https://genome.sph.umich.edu/wiki/METAL">https://genome.sph.umich.edu/wiki/METAL</a>                                                             |
| Minimac3                                                   | Das et al., 2016 <sup>43</sup>                               | <a href="https://genome.sph.umich.edu/wiki/Minimac3">https://genome.sph.umich.edu/wiki/Minimac3</a>                                                       |
| picopili                                                   | Walters et al., 2018 <sup>44</sup>                           | <a href="https://github.com/Nealelab/picopili">https://github.com/Nealelab/picopili</a>                                                                   |
| PLINK 1.9                                                  | PLINK Working Group <sup>45</sup>                            | <a href="https://www.cog-genomics.org/plink/1.9/">https://www.cog-genomics.org/plink/1.9/</a>                                                             |
| PLINK 2                                                    | PLINK Working Group <sup>45</sup>                            | <a href="https://www.cog-genomics.org/plink/2.0/">https://www.cog-genomics.org/plink/2.0/</a>                                                             |
| PRIMUS                                                     | Staples et al., 2013 <sup>46</sup>                           | <a href="http://primus.gs.washington.edu">http://primus.gs.washington.edu</a>                                                                             |
| R 3.3.1                                                    | R Core Team                                                  | <a href="https://www.r-project.org/">https://www.r-project.org/</a>                                                                                       |
| Ricopili                                                   | Lam et al., 2020 <sup>47</sup>                               | <a href="https://hub.docker.com/r/bruggerk/ricopili">https://hub.docker.com/r/bruggerk/ricopili</a>                                                       |
| SHAPEIT                                                    | Delaneau et al., 2011 <sup>48</sup>                          | <a href="https://mathgen.stats.ox.ac.uk/genetics_software/shapeit/shapeit.html">https://mathgen.stats.ox.ac.uk/genetics_software/shapeit/shapeit.html</a> |

### RESOURCE AVAILABILITY

#### Lead contact

Further information and requests may be directed to the lead contact Elise Robinson ([erob@broadinstitute.org](mailto:erob@broadinstitute.org)).

#### Materials availability

This study did not generate new unique reagents.

#### Data and code availability

- The iPSYCH data reported in this study cannot be deposited in a public repository because of the sensitive nature of the data. The iPSYCH Consortium is working with GDPR compliant models for remote access. To request access, please contact authors Preben Bo Mortensen ([pbm@econ.au.dk](mailto:pbm@econ.au.dk)) and Anders D. Børglum ([anders@biomed.au.dk](mailto:anders@biomed.au.dk)) for more details.
- The imputed SPARK dataset used in this analysis has been deposited with the Simons Foundation Autism Research Initiative (SFARI) for public distribution. Scientists wishing to access the data set can do so through application to SFARI.
- Approved researchers can access UK Biobank data by applying at <https://www.ukbiobank.ac.uk/enable-your-research/apply-for-access>
- The HapMap 3 and HGDP data are publicly available and listed in the [key resources table](#).
- This study did not generate original code.

## EXPERIMENTAL MODEL AND SUBJECT DETAILS

### Simons simplex collection (SSC)

The SSC consists of over 2,500 simplex families with a child diagnosed with ASD.<sup>26</sup> We performed both family-based and case-control analyses using European ancestry individuals from SSC (see [STAR Methods: Ancestry definition](#)). For analyses without family structure (Figure 2), we analyzed 2,005 probands, 2,061 mothers and 2,079 fathers. For analyses with family structure (Figure 3), we analyzed 1,644 trios with two parents and an ASD offspring, and 1,571 trios with two parents and an unaffected sibling.

### Simons foundation powering autism research for knowledge (SPARK)

SPARK is a large-scale ongoing collection consisting of families with a child diagnosed with ASD.<sup>27</sup> Unlike SSC, parents in SPARK can also have an ASD diagnosis, and we subset to families where both parents do not have ASD. We performed both family-based and case-control analyses using European ancestry individuals from SPARK (see [STAR Methods: Ancestry definition](#)). For analyses without family structure (Figure 2), we analyzed 5,623 probands, 5,375 mothers, and 3,847 fathers from SPARK. For analyses with family structure (Figure 3), we analyzed 3,176 SPARK trios with two parents and an ASD offspring, and 1,559 trios with two parents and an unaffected sibling.

### UK Biobank

The UK Biobank is a cohort of 500,000 individuals living in the UK who were recruited between 2006 and 2010, aged between 40 and 69 years at recruitment. For ease of computation, we randomly selected 20,000 samples from UKB to serve as the population control cohort in our analyses.

### iPSYCH

The Danish Psychiatric Central Research Register and the Danish National Patient register, complete until 2012 and 2013, respectively, contain medical record data on the entire Danish population born between May 1, 1981 and December 31, 2005 ( $n = 1,472,76$ ). The Lundbeck Foundation Initiative for Integrative Psychiatric Research (iPSYCH) consortium has established a large Danish population-based psychiatric case-cohort sample (iPSYCH2012) from this data to investigate the genetic and environmental architecture of severe mental disorders.<sup>49</sup>

## METHOD DETAILS

### Identifying families in Danish registry data

In this work, we focus specifically on ASD cases from iPSYCH ( $n = 16,146$ ), defined as individuals with ICD-10 codes F84.0, F84.1, F84.5, F84.8 or F84.9, as well as ID cases ( $n = 4,727$ ), defined as individuals with any ICD-10 codes from F70-F79. Controls were population representative, randomly sampled individuals from the Danish population ( $n = 30,000$ ). Controls may have psychiatric disorders, with prevalence levels amongst controls matching those seen in the Danish general population.

The iPSYCH2012 cohort contains medical diagnoses, prescribed medicine, and social and socioeconomic data for 449,882 individuals, and their first-degree relatives. Of those, 39,491 individuals had a missing identification number for one or both of their parents or were missing phenotypic sex. In total, there were 410,391 individuals with first degree relatives for which we had phenotypic sex, and an identification number for both parents. Amongst these 410,391 individuals, we identified 274,837 families. We further subset these families to those with more than one offspring ( $n = 94,790$  families).

### Sibling recurrence of ASD and ID

For each family, we selected an index case based on two criteria: (1) sex (male or female), and (2) neurodevelopmental diagnosis (*ASDnoID*, *ASDandID*, or *IDnoASD*). Families without an index case were not considered. If more than one child in a family met the given criteria, one was randomly selected as the index case, with each offspring having an equal probability of being selected as the index case.

We then selected one sibling per index case. If an index case had more than one sibling, one was randomly selected, with each sibling having an equal probability of being selected. Selected siblings were subset to those born between 1981 and 2005. Each of these siblings were matched with two age- and sex-matched Danish population representative controls. All siblings of index cases were removed from the control cohort before being matched.

We then ran logistic regressions  $NDD\ case\ status \sim 1_{sib\ of\ case}$  (where  $1_{sib\ of\ case}$  is an indicator variable for whether the individual was the sibling of an NDD case [1], or an age and sex matched control [0]), to investigate whether siblings of index cases have an increased risk for *ASDnoID*, *ASDandID*, and *IDnoASD* compared to age and sex matched controls.

ORs for increased risk with sibling case status are the exponentiated effect size for the association between sibling case status and diagnosis of a psychiatric disorder. To compare the ORs between siblings of female and male cases, we conducted a Wald test. The Wald test determines whether ORs (from the above described logistic regressions) are significantly different from one another.

This analysis was run for six types of index case: (1) female *ASDnoID*, (2) male *ASDnoID*, (3) female *ASDandID*, (4) male *ASDandID*, (5) female *IDnoASD*, and (6) male *IDnoASD*.

We performed a similar analysis to investigate increased risk of ASD diagnosis by sibling sex, selecting one ASD index case at random for each family, regardless of index case sex and comorbid ID status. If there was more than one offspring with ASD in a family, one offspring was randomly selected as the index case, with each offspring having an equal probability of being selected. Details of this analysis can be found in [Methods S1: Sibling recurrence of ASD and ID](#), by sibling sex, [Figure S1](#) and [Table S8](#).

### Danish genotype data imputation

The iPSYCH2015 sample is an extension of the iPSYCH2012 sample expanding the birth cohorts by 3 years up to 2008 and extending the follow up to 2015, as well as drawing another 20,000 random samples for the random population subcohort. The new additional subsample is called iPSYCH2015i. Details of the sample, genotyping and call sets can be found in prior iPSYCH publications.<sup>15,49,50</sup>

Briefly, DNA was extracted from Guthrie cards in the Danish Neonatal Screening Biobank at Staten Serum Institute (SSI) and whole genome amplified. The two subsamples, iPSYCH2012 and iPSYCH2015i, were processed independently. Genotyping of the iPSYCH2012 sample was performed in 26 waves at the Broad Institute of Harvard and MIT using the PsychChip array from Illumina and the iPSYCH2015i sample was genotyped on the Global Screening Array v2 at the SSI.

Two stages of pre-imputation QC were conducted. In the first stage, we performed a near default Ricopili QC.<sup>47</sup> First, SNPs with a call rate < 0.95 were removed. Next, sample QC was run: we retained individuals with a call rate in cases or controls  $\geq 0.95$  and an autosomal heterozygosity deviation ( $F_{\text{HET}}$ ) within  $\pm 0.20$  of cases or controls. Subsequently, we ran marker QC; retaining markers with call rate  $\geq 0.98$ , difference in missingness  $\leq 0.02$  between cases and controls, minor allele frequency (MAF)  $\geq 0.01$ , Hardy-Weinberg equilibrium (HWE) in controls ( $p \geq 1.0 \times 10^{-6}$ ), and HWE in cases ( $p \geq 1.0 \times 10^{-10}$ ). See <https://sites.google.com/a/broadinstitute.org/ricopili/preimputation-qc> for further details.

The second stage of pre-imputation QC was targeted at batch effects. In iPSYCH2012 we considered three types of potential batch effects: pre-processing plate, array plate and wave, and in iPSYCH2015i we considered pre-processing plate, array plate, and array batch. We evaluated batch effects using unrelated, ancestry matched individuals in order to avoid confounding batch effects with population stratification or cryptic relatedness. For each of the three batch types, we looped over batches, performing a GWAS of each batch against the remaining batches. Association testing was conducted using PLINK (version 1.9). The exclusion of SNPs strongly associated with any of the batch types was based on the minimum p-value across all associations per batch type. The p-value cut-off for the wave and array batch was minimum  $p < 2.0 \times 10^{-10}$ , and for pre-processing plate and array plate, minimum  $p < 2.0 \times 10^{-12}$ .

Imputation was performed separately for the two samples following Ricopili defaults prephasing using Eagle v2.3.5<sup>51</sup> and imputation using Minimac3.<sup>43</sup> As reference we used the public part of the Haplotype Reference Consortium<sup>52</sup> (EGAD00001002729) prepared for the pipeline by the Ricopili team.<sup>47</sup>

### Danish ASD GWAS

Our GWAS cases ( $n = 19,870$ ) and controls ( $n = 39,078$ ), are composed of iPSYCH2015 individuals with ASD and without ASD, respectively.

We defined sample ancestry based on a principal component analysis (PCA) using smartPCA.<sup>38,53</sup> We removed regions of extended linkage disequilibrium<sup>54</sup> (including the HLA region), and thinned the SNPs using PLINK2<sup>45,54</sup> by pruning those with pairwise  $r^2 > 0.075$  in a window of 1000 SNPs with a step size of 100 SNPs, leaving roughly 30k markers.

Using PLINK's identity by state analysis, we identified pairs of samples with  $\hat{\pi} > 0.2$ , and excluded one sample from each pair at random (with a preference for keeping cases). We restricted the cohort to individuals of European ancestry: within an ellipsoid in the space of PCs 1-3, centered on the mean of samples with all parents and grandparents born in Denmark according to national registries, and within 8 SDs along each of the first three principal axes. Following restriction to these samples, we conducted a second PCA on these individuals and used the PCs as covariates for the association analysis.

We conducted association analyses separately in iPSYCH2012 and iPSYCH2015i using PLINK on the imputed dosage data, and controlling for the first ten PCs. We meta-analyzed the results of the two ASD GWAS using METAL<sup>42</sup> (July 2010 version) with an inverse variance weighted fixed effect model.<sup>55</sup>

### SSC imputation

The imputation and QC of SSC genotype data has been described previously.<sup>4</sup> Each member of the family was genotyped on one of the following arrays: Illumina Omni2.5, Illumina 1Mv3, or Illumina 1Mv1 (hg19). Note that the SSC cohort only includes unaffected parents and a single ASD proband. A single unaffected sibling per family is included in analysis; if there are multiple in a family, the sibling closest in age to the proband (SSC: "designated sibling") is included.

### SPARK imputation

SPARK samples were genotyped on the Illumina Infinium Global Screening Array-24 v1.0 (GRCh38). Liftover from GRCh38 to hg19 was carried out using Hail (<https://hail.is/>). SPARK data were processed, restricted to individuals of European ancestry, and imputed using the Picopili pipeline<sup>44</sup> (<https://github.com/Nealelab/picopili>), which is an adaptation and extension of Ricopili<sup>47</sup> for family data. Phasing and imputation were conducted using SHAPEIT<sup>48</sup> and IMPUTE2,<sup>40</sup> respectively, using Haplotype Reference Consortium<sup>52</sup> (HRC) data and genome build hg19. Genotypes were called for 7,124,628 autosomal SNPs (minimum posterior probability >0.8), with a genotyping rate of 0.995 across 16,965 samples of European ancestry. We removed SPARK parents with an ASD diagnosis from analysis. We



included all probands from multiplex families as well as all unaffected siblings. Additional details on genotype QC and imputation of SPARK data can be found in [Methods S2](#): SPARK ancestry assignment, pre-imputation quality control, and imputation.

### De novo variant analysis

We downloaded gVCFs generated by GATK for 27,270 individuals from SFARIbase (/SPARK/Regeneron/SPARK\_Freeze\_20190912/Variants/GATK/). All gVCFs were generated with GATK v4.1.2.0 HaplotypeCaller using default thresholds and based on hg38 reference and target files provided by Regeneron (genome.hg38rg.fa and xgen\_plus\_spikein.b38.bed respectively). We then performed joint calling of these 27,270 sample gVCFs via GATK to produce one unified vcf for the SPARK cohort. Subsequent variant filtering QC of SPARK data, as well as *de novo* variant detection, were carried out using consistent thresholds with those described previously.<sup>7</sup> Whole-exome sequencing and QC of SSC data has been described previously.<sup>7,11</sup>

We identified the ASD probands in SSC and SPARK who carried a *de novo* variant in a class previously associated with ASD risk.<sup>56</sup> These variants constitute three groups: (1) protein-truncating variants to genes intolerant of heterozygous loss of function variation (constrained gene: probability of loss of function intolerance > 0.9),<sup>57</sup> (2) copy number variants (deletions or duplications) affecting at least one constrained gene<sup>4,7</sup> and (3) predicted protein-altering missense variant in a missense constrained gene or region, defined by a Missense badness, PolyPhen-2, and Constraint (MPC) score  $\geq 2$ <sup>58</sup> (missense class B variant<sup>4,7</sup>). Collectively, 11.6% of SSC probands carry at least one of these variants, while 12.2% of SPARK probands carry at least one. Across SSC and SPARK, 11.2% of male probands carry at least one of these variants, while 17.4% of female probands carry at least one.

### Ancestry definition in SSC, SPARK and UKB

We randomly selected 20,000 samples from UKB to serve as the population control cohort. Using PLINK (version 1.9), we then constructed a merged file with these genotyped controls, SSC (n = 10,206), SPARK (n = 16,965) and HapMap 3<sup>34</sup> (n = 988) for the purpose of defining ancestry. We retained SNPs with MAF > 0.01 and missingness < 0.25%. Of the remaining SNPs, we randomly sampled 10,000 for ease of computation when calculating PCs. We then used PLINK to calculate the PCs. To define ancestry, we merged all 48,159 samples, performed PCA, and selected a sub-sample of our cases and controls that clustered with Europeans in HapMap ( $-0.002 < PC1 < 0.003$ ,  $-0.004 < PC2 < 0.003$ ) ([Figure S2](#)).

We then calculated PCs in this European ancestry subset of UKB, SSC and SPARK ([Figure S3](#)). First, we retained SNPs with MAF > 0.01 and missingness < 1%. Then, we performed LD pruning using PLINK to retain SNPs in approximate linkage equilibrium (–indep-pairwise 50 5 0.15). Next, we removed SNPs in 24 regions of long-range LD (mean partition size: 5.5Mb).<sup>54</sup> We then used PLINK to perform PCA on the remaining 95,509 SNPs and used the first 15 PCs for downstream analyses to control for ancestry.

### Generation of polygenic risk score

We used LDpred<sup>41</sup> (version 1.0.11) and the marginal effect sizes from the iPSYCH2015 ASD GWAS to generate a polygenic risk score, using the infinitesimal model, European ancestry subset of Hapmap 3 for LD reference, and an LD radius of 384 SNPs (per LDpred guidance). The weights from LDpred were used to calculate per sample ASD PRS using linear scoring in PLINK. There were 630,583 markers in common between the genotypes and the markers in the iPSYCH2015 ASD GWAS summary statistics, all of which were used in the polygenic risk score.

### Polygenic risk comparisons

We performed two classes of analyses to compare polygenic burden between groups. The first is a between-group comparison, where the PRS between two groups is compared using linear regression while controlling for PCs, specifically:  $ASD\ PRS \sim group\ indicator + PCs\ 1 - 15$ . Here, only samples of European ancestry and their PCs are used (as discussed above in “[Ancestry definition](#)”). This approach was performed for comparisons in [Figure 2](#). The between group differences in PRS are scaled by the standard deviation of the distribution of ASD PRS in the UK Biobank controls ( $SD = 1.01 \times 10^{-7}$ ). In a similar analysis, we compared PRS between male and female cases, controlling for comorbid ID:  $ASD\ PRS \sim sex + ID\ status + PCs\ 1 - 15$ . The second approach is a within-family pTDT,<sup>4</sup> where a *t*-statistic of the deviation of the offspring’s polygenic risk from the mean parent expectation is compared to the null hypothesis of 0, using a two-sided one-sample *t*-test. This approach was performed for all comparisons in [Figure 3](#). There is no restriction of ancestry in this analysis as comparisons are within family transmission tests. Polygenic deviations are scaled by the standard deviation of the distribution of mid-parent PRS for all families with a sequenced proband in SSC + SPARK ( $SD = 7.25 \times 10^{-8}$ ). The comparison of pTDT values between groups in [Figure 3](#) is performed as a two-sided two-sample *t*-test of each pTDT deviation distribution.

All underlying data to generate figures can be found in [Tables S1–S7](#).

## QUANTIFICATION AND STATISTICAL ANALYSIS

The quantitative and statistical analyses are described in the relevant sections of the [Method details](#) or in the table and figure legends.

**Supplemental information**

**The female protective effect  
against autism spectrum disorder**

**Emilie M. Wigdor, Daniel J. Weiner, Jakob Grove, Jack M. Fu, Wesley K. Thompson, Caitlin E. Carey, Nikolas Baya, Celia van der Merwe, Raymond K. Walters, F. Kyle Satterstrom, Duncan S. Palmer, Anders Rosengren, Jonas Bybjerg-Grauholm, iPSYCH Consortium, David M. Hougaard, Preben Bo Mortensen, Mark J. Daly, Michael E. Talkowski, Stephan J. Sanders, Somer L. Bishop, Anders D. Børglum, and Elise B. Robinson**

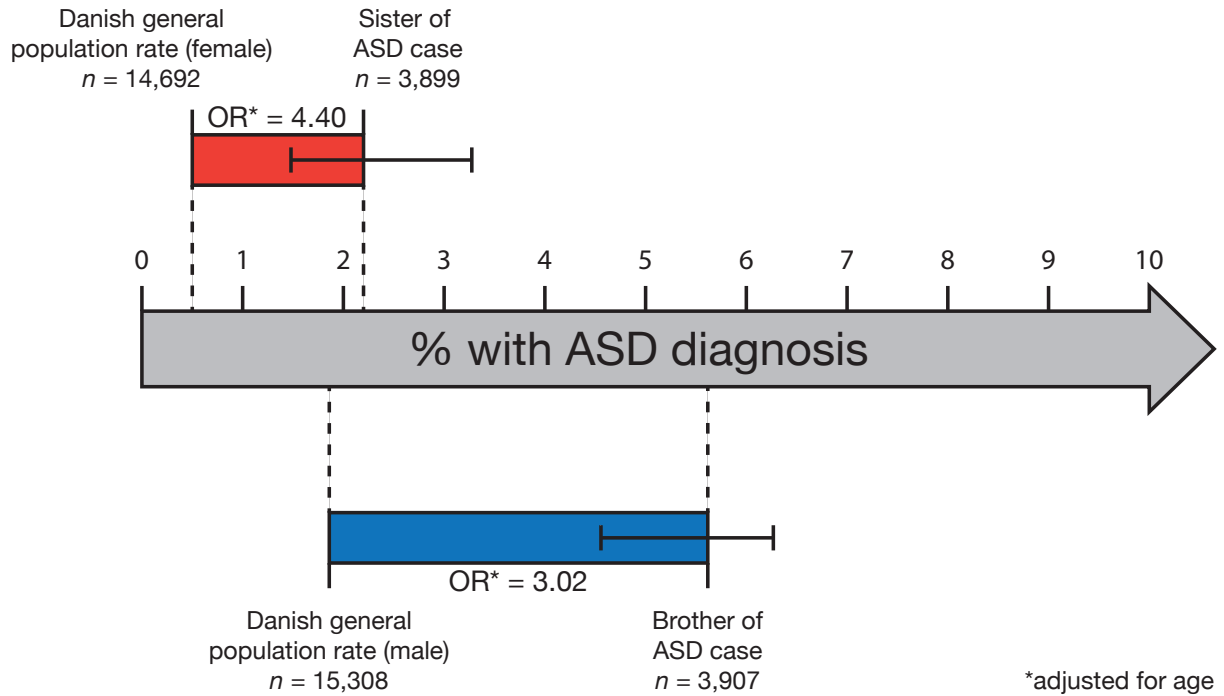

**Figure S1. Increased risk for ASD in sisters and brothers of ASD cases compared to Danish population controls.** ORs are the exponentiated betas from logistic regression (see STAR Methods; Sibling recurrence of ASD and ID). Error bars are 95% confidence intervals. The start positions of the colored bars represent the prevalence of ASD in the Danish general population, by sex. The end positions of the colored bars represent the projected risk of ASD in siblings, by sex. The end positions are calculated by multiplying the baseline prevalence by the OR.

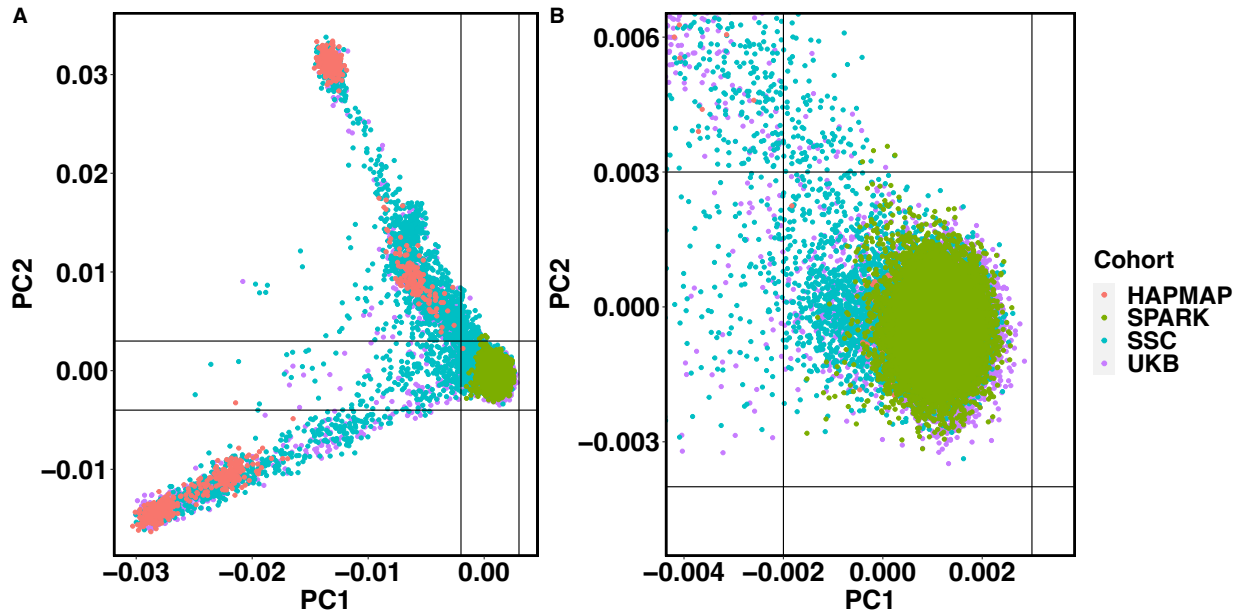

**Figure S2. PCA of SPARK, SSC and UKB with HapMap.** Colored dots represent individuals from HapMap, SPARK, SSC and UKB ( $n=48,159$ ) (see STAR Methods; Ancestry definition in SSC, SPARK and UKB). A) All 48,159 samples plotted for principal component 1 and principal component 2. B) A selected sub-sample of our cases and controls that clustered with Europeans in HapMap ( $-0.002 < PC1 < 0.003$ ,  $-0.004 < PC2 < 0.003$ ). Horizontal and vertical lines correspond to those PC thresholds.



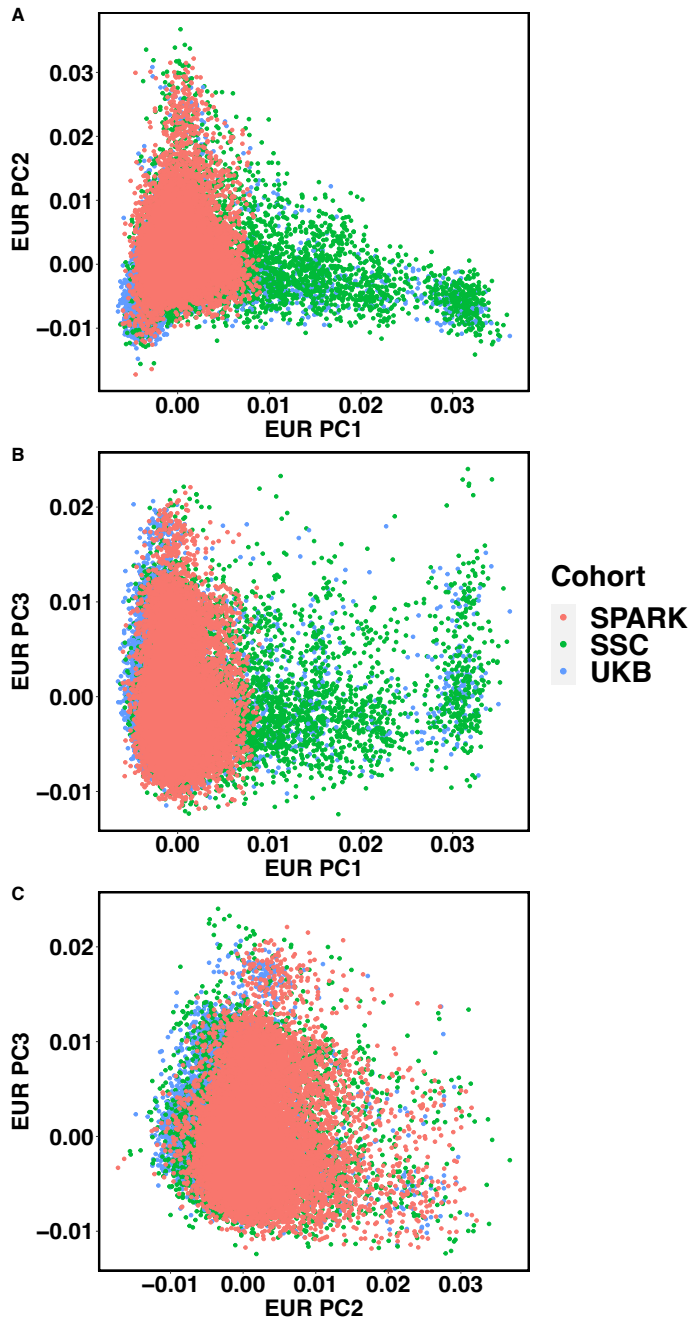

**Figure S3. Within-European PCA of SPARK, SSC and UKB.** Principal components in the European ancestry subset of UKB, SSC and SPARK defined in Supplementary Figure 2 (see STAR Methods; Ancestry definition in SSC, SPARK and UKB). A) Principal component 1 versus principal component 2. B) Principal component 1 versus principal component 3. C) Principal component 2 versus principal component 3.

| Phenotype      | OR siblings of female cases (95% CI) (N=1,707 siblings, N=3,414 controls) | OR siblings of male cases (95% CI) (N=6,270 siblings, N=12,540 controls) | Wald test p value         |
|----------------|---------------------------------------------------------------------------|--------------------------------------------------------------------------|---------------------------|
| ID without ASD | 1.77 (0.88-3.56)                                                          | 1.71 (1.13-2.60)                                                         | $8.88 \times 10^{-1}$     |
| ASD and ID     | 6.06 (2.40-15.28)                                                         | 4.66 (2.72-7.98)                                                         | $1.10 \times 10^{-2}$     |
| ASD without ID | 7.19 (5.09-10.09)                                                         | 3.76 (3.10-4.54)                                                         | $P < 1.0 \times 10^{-10}$ |

**Table S1.** Contains data underlying Figure 1. Siblings of cases with diagnosis of ASD without ID.

| Phenotype      | OR siblings of female cases (95% CI) (N=506 siblings, 1,012 controls) | OR siblings of male cases (95% CI) (N=811 siblings, N=1,622 controls) | Wald test p value     |
|----------------|-----------------------------------------------------------------------|-----------------------------------------------------------------------|-----------------------|
| ID without ASD | 10.03 (3.80-26.44)                                                    | 11.03 (4.89-24.85)                                                    | $1.21 \times 10^{-1}$ |
| ASD and ID     | 2.00 (0.12-32.07)                                                     | 6.02 (0.63-57.95)                                                     | $2.80 \times 10^{-2}$ |
| ASD without ID | 2.01 (0.80-5.12)                                                      | 1.49 (0.79-2.80)                                                      | $3.60 \times 10^{-1}$ |

**Table S2.** Contains data underlying Figure 1. Siblings of cases with diagnosis of ID without ASD.

| Group     | N mothers | N fathers | Beta raw              | SE raw                | P value               | Beta scaled           | SE scaled             |
|-----------|-----------|-----------|-----------------------|-----------------------|-----------------------|-----------------------|-----------------------|
| SSC       | 2061      | 2079      | $8.40 \times 10^{-9}$ | $3.16 \times 10^{-9}$ | 0.00798               | $8.29 \times 10^{-2}$ | $3.12 \times 10^{-2}$ |
| SPARK     | 5375      | 3847      | $8.66 \times 10^{-9}$ | $2.14 \times 10^{-9}$ | $5.21 \times 10^{-5}$ | $8.55 \times 10^{-2}$ | $2.11 \times 10^{-2}$ |
| SSC+SPARK | 7436      | 5926      | $8.77 \times 10^{-9}$ | $1.77 \times 10^{-9}$ | $6.95 \times 10^{-7}$ | $8.66 \times 10^{-2}$ | $1.75 \times 10^{-2}$ |

**Table S3.** Contains data underlying Figure 2. Results of linear regression of PRS ~ Mother (1/0) + PC1-15 in SSC, SPARK and SSC+SPARK.

| Group          | N mothers | N fathers | N UKB | Beta raw              | SE raw                | P value                | Beta scaled           | SE scaled             |
|----------------|-----------|-----------|-------|-----------------------|-----------------------|------------------------|-----------------------|-----------------------|
| UKB, SSC+SPARK | NA        | 5926      | 18862 | $1.76 \times 10^{-8}$ | $1.66 \times 10^{-9}$ | $2.04 \times 10^{-26}$ | $1.74 \times 10^{-1}$ | $1.63 \times 10^{-2}$ |
| UKB, SSC+SPARK | 7436      | NA        | 18862 | $2.68 \times 10^{-8}$ | $1.52 \times 10^{-9}$ | $4.87 \times 10^{-69}$ | $2.64 \times 10^{-1}$ | $1.50 \times 10^{-2}$ |
| UKB, SSC+SPARK | 7436      | 5926      | 18862 | $2.33 \times 10^{-8}$ | $1.27 \times 10^{-9}$ | $1.93 \times 10^{-75}$ | $2.30 \times 10^{-1}$ | $1.25 \times 10^{-2}$ |

**Table S4.** Contains data underlying Figure 2. Results of linear regression of PRS ~ Parent (1/0) + PC1-15 in UKB and SSC+SPARK.

| Group | N fathers | N mothers | Beta raw              | SE raw                | P value               | Beta scaled           | SE scaled             |
|-------|-----------|-----------|-----------------------|-----------------------|-----------------------|-----------------------|-----------------------|
| UKB   | 8679      | 10183     | $2.10 \times 10^{-9}$ | $1.48 \times 10^{-9}$ | $1.54 \times 10^{-1}$ | $2.08 \times 10^{-2}$ | $1.46 \times 10^{-2}$ |

**Table S5.** Contains data underlying Figure 2. Results of linear regression of PRS ~ Mother (1/0) + PC1-15 in UK Biobank.

| Group     | N mothers | N probands | Beta raw              | SE raw                | P value               | Beta scaled           | SE scaled             |
|-----------|-----------|------------|-----------------------|-----------------------|-----------------------|-----------------------|-----------------------|
| SSC+SPARK | 7436      | 7628       | $9.35 \times 10^{-9}$ | $1.64 \times 10^{-9}$ | $1.22 \times 10^{-8}$ | $9.23 \times 10^{-2}$ | $1.62 \times 10^{-2}$ |

**Table S6.** Contains data underlying Figure 2. Results of linear regression of PRS ~ Proband (1/0) + PC1-15.

| Group                      | N    | Raw mean               | Raw lower 95 % CI      | Raw upper 95 % CI       | P value                | Scaled mean            | Scaled lower 95 % CI   | Scaled upper 95 % CI   |
|----------------------------|------|------------------------|------------------------|-------------------------|------------------------|------------------------|------------------------|------------------------|
| Male proband, de novo      | 436  | $5.90 \times 10^{-9}$  | $-1.04 \times 10^{-9}$ | $1.28 \times 10^{-8}$   | 0.10                   | $8.13 \times 10^{-2}$  | $-1.43 \times 10^{-2}$ | $1.77 \times 10^{-1}$  |
| Male proband, no de novo   | 3468 | $1.26 \times 10^{-8}$  | $1.02 \times 10^{-8}$  | $1.49 \times 10^{-8}$   | $9.72 \times 10^{-25}$ | $1.73 \times 10^{-1}$  | $1.40 \times 10^{-1}$  | $2.06 \times 10^{-1}$  |
| Female proband, de novo    | 159  | $8.16 \times 10^{-9}$  | $-2.64 \times 10^{-9}$ | $1.90 \times 10^{-8}$   | 0.14                   | $1.13 \times 10^{-1}$  | $-3.64 \times 10^{-2}$ | $2.61 \times 10^{-1}$  |
| Female proband, no de novo | 757  | $1.64 \times 10^{-8}$  | $1.15 \times 10^{-8}$  | $2.13 \times 10^{-8}$   | $7.82 \times 10^{-11}$ | $2.26 \times 10^{-1}$  | $1.59 \times 10^{-1}$  | $2.94 \times 10^{-1}$  |
| Male siblings              | 1519 | $-3.89 \times 10^{-9}$ | $-7.45 \times 10^{-9}$ | $-3.31 \times 10^{-10}$ | 0.032                  | $-5.37 \times 10^{-2}$ | $-1.03 \times 10^{-1}$ | $-4.57 \times 10^{-3}$ |
| Female siblings            | 1611 | $-1.53 \times 10^{-9}$ | $-5.02 \times 10^{-9}$ | $1.95 \times 10^{-9}$   | 0.39                   | $-2.11 \times 10^{-2}$ | $-6.92 \times 10^{-2}$ | $2.70 \times 10^{-2}$  |
| Mothers                    | 4820 | $4.53 \times 10^{-9}$  | $2.54 \times 10^{-9}$  | $6.51 \times 10^{-9}$   | $8.20 \times 10^{-6}$  | $6.24 \times 10^{-2}$  | $3.50 \times 10^{-2}$  | $8.98 \times 10^{-2}$  |
| Fathers                    | 4820 | $-4.53 \times 10^{-9}$ | $-6.51 \times 10^{-9}$ | $-2.54 \times 10^{-9}$  | $8.20 \times 10^{-6}$  | $-6.24 \times 10^{-2}$ | $-8.98 \times 10^{-2}$ | $-3.50 \times 10^{-2}$ |

**Table S7.** Contains data underlying Figure 3. pTDT results for SSC and SPARK jointly.

| Population Prevalence of ASD among female population controls (N=14,692) | Population Prevalence of ASD among male population controls (N=15,308) | OR (95% CI) Sisters (N=3,899), Controls (N=7,798) | OR (95% CI) Brothers (N=3,907), Controls (N=7,814) | Wald p value          |
|--------------------------------------------------------------------------|------------------------------------------------------------------------|---------------------------------------------------|----------------------------------------------------|-----------------------|
| 0.5%                                                                     | 1.86%                                                                  | 4.40 (2.96-6.55)                                  | 3.02 (2.45-3.73)                                   | $1.75 \times 10^{-9}$ |

**Table S8.** Contains data underlying Figure S1. Sisters and brothers of cases with diagnosis of ASD (See Methods S1; STAR Methods: Sibling recurrence of ASD and ID).

**Methods S1.** Sibling recurrence of ASD and ID, by sibling sex. Contains additional methods details from STAR Methods: Sibling recurrence of ASD and ID.

We hypothesized that given a FPE, brothers of ASD cases would have increased risk for ASD compared to sisters of ASD cases. Sisters of ASD cases have significantly increased risk for ASD (OR = 4.40, 95% CI = 2.96-6.55), calculated as fold-change over age and sex matched controls, compared to brothers of ASD cases (OR = 3.02, 95% CI = 2.45-3.73,  $P = 1.75 \times 10^{-9}$ , Wald test; see STAR Methods: Siblings recurrence of ASD and ID). However, the baseline prevalence of ASD amongst females in the Danish general population is lower than the baseline prevalence of ASD amongst males in the Danish general population. Therefore, sisters of ASD cases' overall risk for ASD remains lower than for brothers of ASD cases. The prevalence of ASD in the female Danish general population is 0.5%. A 4.4 fold increase in risk for ASD with a baseline risk of 0.5% would result in a 2.2% chance of having ASD. The prevalence of ASD in the male Danish general population is 1.86%. A 3.02 fold increase in risk for ASD with a baseline risk of 1.86% would result in a 5.62% chance of having ASD.

For each family, we selected an index ASD case regardless of sex and comorbid ID status. For each index case, we randomly selected a sibling, each with equal probability of selection. We then split the selected siblings by sex, into sisters and brothers of ASD cases.

Selected siblings were subset to those born between 1981 and 2005. Each of these siblings were matched with two age and sex matched Danish population representative controls ( $n = 30,000$ ). All siblings of index cases were removed from the control cohort before being matched.

We then ran logistic regression,  $NDD\ case\ status \sim 1_{sib\ of\ case}$  (where  $1_{sib\ of\ case}$  is an indicator variable for whether the individual was the sibling of an NDD case ( $= 1$ ), or an age and sex matched control ( $= 0$ )), for sisters and brothers separately to investigate whether they have an increased risk for *ASDnoD*, *ASDandID*, and *IDnoASD* compared to age and sex matched controls.

ORs for increased risk with sibling case status are the exponentiated effect sizes for the association between sibling case status and diagnosis of a psychiatric disorder. To compare ORs between sisters and brothers of ASD cases, we conducted a Wald test.

**Methods S2:** SPARK ancestry assignment, pre-imputation quality control and imputation. Contains additional methods details from STAR Methods: SPARK Imputation.

### Ancestry Assignment

Self-reported demographic data were not available for the majority of SPARK participants, though existing data suggests that the racial and ethnic representation approximates that of the larger US population.<sup>27,28</sup> To determine which individuals were of European ancestry, we first restricted to a maximally unrelated ( $\hat{\pi} < 0.09375$ ; midpoint between 3rd and 4th degree relatives) set of pedigree-reported founders as defined by PRIMUS ( $n = 13,976$ )<sup>59</sup>. We then performed<sup>60</sup> PCA via EIGENSOFT<sup>38,39</sup> on this sample after combining with those in the Human Genome Diversity Project (HGDP).<sup>60-63</sup> We used the HGDP sample in order to capture the full axes of ancestral variation within the SPARK sample. For the purposes of PCA, only variants passing a strict set of



Ricopili QC measures (missingness < 5%, HWE  $P > 1.0 \times 10^{-3}$ , strand-unambiguous, and not in regions of high LD such as the MHC and chr8 inversion) were used, pruned to be pairwise independent at  $r^2 < 0.2$ . Additionally, 70 SNPs with allele frequency differences of > 0.2 between SPARK and HGDP self-reported EUR samples were removed. Non-founders were projected into the PC space of unrelated founders and the HGDP sample using `hwe_normalized_pca` in Hail (<https://hail.is/>). ADMIXTURE<sup>36</sup> was used in order to identify ancestral subpopulations within the joint SPARK + HGDP sample described above; cross-validation suggested the presence of 5 subpopulations. Individuals were labelled as having primarily EUR ancestry ( $n = 17,098$ ) if their ancestral makeup, as determined by ADMIXTURE, was 85% or greater from Population 0. Population 0 was determined to be the EUR subpopulation as it contained a high prevalence of HGDP EUR and self-reported SPARK White/Caucasian relative to other HGDP or other self-reported ancestry, respectively.

### Pre-imputation QC

Upon restricting to individuals of primarily EUR ancestry, we undertook both sample and variant-level QC procedures consistent with the Ricopili and picopili standards. Samples were removed for the following reasons: missingness rate > 0.02 ( $n = 71$ ), absolute  $F_{\text{HET}}$  homozygosity rate > 0.2 ( $n = 2$ ), Mendelian error rate > 0.02 ( $n = 0$ ), sex check errors ( $n = 14$ ), and cryptic relatedness ( $\hat{\pi} > 0.09375$  across families;  $n = 46$ ). All self-reported pedigrees were confirmed via genetically derived kinship coefficients. Variants retained for inclusion were required to have missingness < 0.02; absolute differential missingness between cases and controls < 0.02; Mendelian error rates < 0.01; and HWE  $P > 1.0 \times 10^{-10}$  in founder cases, HWE  $P > 1.0 \times 10^{-6}$  in founder controls, and HWE  $P > 1.0 \times 10^{-10}$  in all founders. Post-QC, 16,965 samples and 557,368 variants remained for imputation.

### Imputation

Autosomes were imputed to the Haplotype Reference Consortium (HRC)<sup>52</sup> reference panel using SHAPEIT<sup>48</sup> and IMPUTE2<sup>40,48</sup> in the picopili pipeline (<https://github.com/Nealelab/picopili>). Phasing was performed using SHAPEIT including its duoHMM algorithm, which uses pedigree information when available for more accurate results.<sup>64</sup> Best-guess genotypes were called for autosomal SNPs (minimum posterior probability > 0.8) and subsequently filtered to SNPs with missingness < 0.02, INFO > 0.6, and MAF > 0.005, for a final total of 7,124,628 SNPs with a genotyping rate of 0.995 across 16,965 samples.
